# Supplementary material
Source: PubMed Central journal article supplement (PMC9188659)
Supplement: mmc1.pdf [file mmc1.pdf]

# Stepping Up During a Crisis: The Unintended Effects of a Noncontributory Pension Program during the Covid-19 Pandemic.

NICOLAS BOTTAN, BRIDGET HOFFMANN, AND DIEGO A. VERA-COSSIO \*

*We use a regression discontinuity design to study the impacts of a noncontributory pension program covering one-third of Bolivian households during the COVID-19 pandemic. Becoming eligible for the program during the crisis increased the probability that households had a week's worth of food stocked by 25% and decreased the probability of going hungry by 40%. Although the program was not designed to provide emergency assistance, it provided unintended positive impacts during the crisis. The program's effects on hunger were particularly large for households that lost their livelihoods during the crisis and for low-income households. The results suggest that, during a systemic crisis, a preexisting near-universal pension program can quickly deliver positive impacts in line with the primary goals of a social safety net composed of an income-targeted cash transfer and an unemployment insurance program.*

*JEL: H55,H84,I15,138*

*Keywords: Cash transfers, Resilience, Social insurance, COVID-19, Noncontributory pensions*

## I. Introduction

The COVID-19 pandemic and policies to contain it caused an unprecedented economic crisis with substantial income and labor market impacts for households. In developing countries, households are particularly vulnerable to economic crises because high levels of labor market informality limit the coverage of unemployment insurance schemes, access to formal credit is limited, and informal risk-sharing mechanisms break down during systemic shocks (Mace, 1991). Unless households have substantial savings to rely on, this leaves low- and middle-income households vulnerable to sliding into poverty. During the delay before new social programs can be implemented to confront a crisis, existing cash transfer programs may have substantial positive effects and those with broad coverage may deliver unintended positive impacts (Banerjee et al., 2020).

In developing countries, near-universal noncontributory pension programs are a fundamental

\* Nicolas Bottan: Department of Policy Analysis and Management, Cornell University. Bridget Hoffmann: Research Department, Inter-American Development Bank, 1300 New York Ave., NW, Washington, DC; e-mail: [bridgeth@iadb.org](mailto:bridgeth@iadb.org). Diego Vera-Cossio: Research Department, Inter-American Development Bank, 1300 New York Ave., NW, Washington, DC; e-mail: [diegove@iadb.org](mailto:diegove@iadb.org). We would like to thank Sebastian Espinoza and Maria Paula Medina for their superb research assistance. We also thank Prashant Bharadwaj, Juan Pablo Chauvin, Rema Hanna, Seema Jayachandran, Gaurav Khanna, Cynthia Kinnan, Sebastián Gallegos, Craig McIntosh, Paul Niehaus, and Mauricio Romero for helpful comments. All errors are our own. We received funding from IDB (RG-1700). The data collection in this study received approval from the Institutional Review Board at Cornell University (#2003009501). Declarations of interest:none. Opinions, findings, conclusions, and recommendations expressed here are those of the authors and do not necessarily reflect the views of the Inter-American Development Bank.

component of social safety nets.<sup>1</sup> Although the introduction of noncontributory pensions has led to a wide array of welfare-increasing effects during non-crisis times,<sup>2</sup> their ability to provide relief during systemic crises has not been documented. These programs are not designed to provide emergency relief; they are designed to support elderly households' consumption as they withdraw from the labor market. But, in a context with many multi-generational households and little opportunity for intra-household substitution of labor, these programs may provide resources to attenuate the negative impacts of labor market shocks experienced by prime-age household members during crises.

In this paper, we provide evidence that an established, noncontributory pension program in Bolivia reduced financial insecurity, food insecurity, and stress during the pandemic, with particularly large impacts for low-income households and those that experienced a large labor market shock. We study the effects of becoming eligible for the *Renta Dignidad* program in Bolivia during the onset of the COVID-19 pandemic. *Renta Dignidad*, established in 2008, provides a basic monthly income of US\$ 50 to the elderly, regardless of their income or contributions to social security. The program has broad coverage. In 2018, it reached one-third of Bolivian households, representing over 1% of Bolivian GDP. Because adults become eligible for the program upon turning 60 years old, we use a regression discontinuity (RD) design to compare outcomes of households with adults who just became eligible for the program during the onset of the pandemic (March 2020) to those who would have been eligible had they turned 60 earlier. We implement our empirical strategy using near-real-time data collected online in April 2020, just days after the implementation of mobility-restriction policies.

Bolivian households reported high rates of food and resource insecurity and stress at the onset of the pandemic. Among households close to becoming eligible for the program, 42% of households reported eating less healthily during the pandemic, 18% of households reported experiencing hunger, 48% of households did not have enough resources to cover a week of expenses, and 80% of survey respondents reported stress related to the pandemic. We find that eligibility for *Renta Dignidad* improved many of these outcomes.

First, we provide evidence that eligibility for the program had substantial positive impacts at the onset of the pandemic with improvements in resilience, food security, and stress. Specifically, we find that becoming eligible for the program increased the probability of having enough cash

<sup>1</sup>In Latin America and the Caribbean, noncontributory pensions represent, on average, 0.38% of GDP which is slightly higher than the average spending on Conditional Cash Transfer programs as a share of GDP (0.34%) (Duryea and Robles, 2016)

<sup>2</sup>See for example, several impact evaluation of the introduction or expansion of noncontributory pension programs (Case and Deaton, 1998; Cruces and Bergolo, 2013; Ardington, Case and Hosegood, 2009; de Carvalho Filho, 2008; Fan, 2010; Galiani, Gertler and Bando, 2016, 2018)

and food on hand to cover more than a week’s worth of necessities by 12 and 8 percentage points, respectively. We also find a 9-percentage-point decline in the probability of experiencing hunger (a 40% reduction) and a similar decline in the probability of eating less healthily, which are consistent with evidence from the COVID-19 economic stimulus cash transfer in the United States (Baker et al., 2020). We also find suggestive, albeit noisier, declines in stress. The results are robust to varying the estimation bandwidths, degree of the polynomials, and to falsification tests.

We replicated our empirical strategy using household-survey data from 2016 to 2018 to obtain a benchmark for our estimates. We find no evidence that program eligibility decreased the probability of experiencing hunger in 2016-2018. We can reject an effect size equal to that estimated in the survey data at the onset of the pandemic at the 5% level. Although these two results are not directly comparable because of differences in the data collection process, the stark contrast between this finding and the results using data from the onset of the pandemic suggests that households faced with additional liquidity constraints during the pandemic relied on the program to avoid hunger and achieve a basic level of food consumption. The ability of the program to prevent hunger is important because one of the negative consequences of the pandemic is expected to be a decrease in food security (Ray and Subramanian, 2020), which can decrease productivity (Schofield, 2019) and have long-lasting consequences (Maluccio et al., 2009).

Second, our results suggest that a near-universal pension program can quickly deliver positive impacts in line with the primary goals of a social safety net composed of an income-targeted cash transfer program and an unemployment insurance program. We provide evidence that the positive impacts of the program are particularly large for households that experienced a large labor market shock—those that were likely facing tightened liquidity constraints due to the pandemic—and for low-income households for which the transfer represents a larger share of household income. We use data on closures of family-owned businesses (a proxy for self-employment) and job losses during the onset of the pandemic, which do not vary discontinuously at the eligibility cutoff, to show that the decline in the probability of experiencing hunger, the most dire outcome, was twice as large for households that experienced business closures. This consumption-smoothing effect is important, as over 65% of households in our sample reported business closures during the early stages of the pandemic, and a large share of them are middle-income households that tend to be excluded from income-targeted programs and are vulnerable to sliding into poverty (Busso et al., 2020). We also find that the effects of the program on resource availability and hunger are particularly large among low-income households.

This paper contributes to the literature that studies the effects of noncontributory pension pro-

grams in developing countries in two ways. First, previous studies analyzed the impact of these programs on recipient households' labor market outcomes and consumption (Case and Deaton, 1998; Cruces and Bérigolo, 2013; de Carvalho Filho, 2008; Fan, 2010), health (Duflo, 2000, 2003), and subjective well-being (Galiani, Gertler and Bando, 2016, 2018),<sup>3</sup> during regular and stable periods. Given that several similar programs in developing countries were implemented after the global crises of 2001-02 and 2007-08, we contribute novel evidence on the salience of well-established noncontributory pension programs during the onset of a devastating crisis by documenting that eligibility for the program increased financial and food security. Second, there is evidence of within-household consequences of pension programs on health (Peluffo, 2019) and labor supply (Ardington, Case and Hosegood, 2009; Chong and Yáñez-Pagans, 2019) in the context of multi-generational households. We provide novel evidence that, during a systemic crisis when within-household substitution of labor is limited, the pension benefits obtained by the elderly can provide important assistance during labor market shocks that are likely affecting prime-age household members.

This paper also contributes to the literature studying consumption smoothing in developing countries by showing that public assistance programs can help households smooth consumption of essentials, particularly food, during a systemic crisis, when the success of risk-sharing networks is limited by the widespread nature of the shocks.<sup>4</sup> These results have important implications for the design of emergency social programs in developing countries,<sup>5</sup> where automatic stabilizers such as unemployment insurance are rarely available, access to cash aid programs for the middle class is limited (Busso et al., 2020), and the welfare gains from insuring against economic shocks can be large (Chetty and Looney, 2006). In this context, our results provide novel evidence that, in a context with many multi-generational households, an established, near-universal pension program can quickly deliver positive impacts in line with the primary goals of a social safety net composed of an income-targeted cash transfer program and an unemployment insurance program. This is crucial as timely implementation of new social programs at scale can be challenging, particularly during the onset of crises.<sup>6</sup> Indeed, recent evidence from a means-tested emergency cash transfer program in Colombia finds very modest impacts coinciding with delivery issues (Londoño-Vélez and Querubin, 2020).

<sup>3</sup>In the case of Bolivia, Mena and Hernani-Limarino (2015) and Borrella Mas, Bosch and Sartarelli (2016) argue that the program induced a decline in labor force participation among recipients, leading to limited changes in income and consumption. However, Escobar, Martinez and Mendizabal (2013) find increases in per-capita consumption.

<sup>4</sup>Townsend (1994), among others, analyze the ability of households to insure against idiosyncratic shocks, while Jack and Suri (2014) and Riley (2018) study the role of cross-locality transfers to smooth consumption. Mace (1991) shows that even with complete markets, households can not ex ante insure against aggregate shocks.

<sup>5</sup>Banerjee, Niehaus and Suri (2019) and Hanna and Olken (2018) discuss targeting and coverage.

<sup>6</sup>Recent literature discusses issues related to targeting (Alatas et al., 2016; Niehaus et al., 2013), leakage (Banerjee et al., 2016; Muralidharan, Niehaus and Sukhtankar, 2016), mode of payment, and last-mile delivery (Muralidharan et al., 2018).

## II. Context

We study the context of the *Renta Dignidad* program in Bolivia. The program was initially established in 2008 with the aim of providing a basic income to the elderly. People become eligible for the program when they turn 60 years old, regardless of their income status.<sup>7</sup> As a result, *Renta Dignidad* is a large-scale program that represented 1.3% of Bolivia’s GDP in 2018 and accounted for one-third of Bolivia’s total spending on social protection.<sup>8</sup> The program has broad coverage. In 2018, 28% of households, approximately 1 million, received transfers from the program.<sup>9</sup>

The program provides monthly payments of US\$ 50 to beneficiaries who do not have private retirement pensions (85% of beneficiaries in 2019) and of US\$ 43 to beneficiaries who do have private retirement pensions.<sup>10</sup> The payments per beneficiary represent 30% of the median monthly per-capita household income and 12% of total income for eligible households.<sup>11</sup> To receive the funds, upon turning 60, adults need to register in the program’s database by showing proof of identity. Once registered, beneficiaries access the transfers by the end of the month. For example, a person who turns 60 in March 2020 would start receiving benefits in April 2020. The transfers are cashed out at branches of Banco Union (the state-owned bank), although beneficiaries may request home delivery of the funds if they submit a certification of physical impairment.

### A. *The program and the COVID-19 pandemic*

The first diagnosed case of COVID-19 in Bolivia was confirmed on March 10, 2020, and the first death was announced on March 29, 2020. The government imposed a strict mandatory quarantine on March 21, 2020, with strong enforcement in the main urban centers, limiting the operation of businesses to essential businesses (health centers, pharmacies, markets, and some government offices) and restricting the circulation of motorized vehicles to those with a government license.<sup>12</sup> Figure 1 shows that trips to workplaces fell sharply after March 21, 2020.

During the onset of the pandemic, the *Renta Dignidad* program was the main social-assistance program providing regular monthly payments to beneficiaries.<sup>13</sup> Starting April 1, 2020, the gov-

<sup>7</sup>There is one exception: Workers who are still on the public-sector payroll after turning 60 are ineligible to receive resources from *Renta Dignidad*. Less than 1% of adults 60 years old or older formally work in the public sector. The minimum retirement age in Bolivia is 55 for females and 58 for males.

<sup>8</sup>See <https://dds.cepal.org/bpsnc/programa?id=42>

<sup>9</sup>Statistic computed based on the 2018 wave of *Encuesta de Hogares*, which is conducted by the national bureau of statistics (Instituto Nacional de Estadísticas, INE)

<sup>10</sup>Only 15% of beneficiaries during 2019 also receive private retirement pensions according to administrative data from the pensions regulator *Autoridad de Fiscalización y Control de Pensiones y Seguros* (APS).

<sup>11</sup>We use the INE 2018 Household Survey to compute household income.

<sup>12</sup>Some branches of Banco Union were kept open.

<sup>13</sup>There were two other cash-transfer programs: The *Bono Juancito Pinto*—a conditional cash transfer (CCT) program for children enrolled in public schools (Vera-Cossio, 2020), and the *Bono Juana Azurduy*—a CCT for pregnant women and mothers

ernment doubled the transfer amount for beneficiaries who were not receiving other government pensions. The government also allowed the payments to be made to authorized family members on behalf of beneficiaries so that the elderly would not have to go to bank branches. The disbursements were still in person, but the government partnered with private banks to increase the number of locations authorized to disburse the transfers. The eligibility criterion was not modified.<sup>14</sup>

### III. Data and Measurement

We use near-real-time data collected through online surveys in Bolivia implemented as part of the IDB/Cornell Coronavirus Survey.<sup>15</sup> Participants were recruited through the following process. First, links to the survey were posted by the Inter-American Development Bank (IDB) on social media using its institutional account. Second, the post was disseminated through paid social-media ads. The ads were targeted using keywords related to general-interest topics, such as “futbol” and the names of local celebrities.<sup>16</sup>

We received 26,181 complete responses in Bolivia from April 3, 2020 to April 30, 2020. Thus, the data provides information collected during the onset of the pandemic, in the period when mobility was restricted the most (see Figure 1). For a subset of 11,633 responses from households with at least one household member age 55 or older, we collected information regarding the month and year of birth of the oldest household member.

Our sample includes respondents from all income levels. However, respondents of our online survey are more educated than the average Bolivian. Appendix Table A1 shows that the online sample more closely resembles, in terms of demographic attributes, respondents of the 2018 nationally representative household survey in urban areas. When the data collection began on April 3, 2020, there were less than 100 cases in Bolivia, which were concentrated in the main urban areas. Thus, our online sample covers the subset of the population with the highest exposure to the early impacts of the pandemic.

Figure 1 depicts the evolution of COVID-19 cases in Bolivia over time, the changes in trips to workplaces based on Google’s Community Mobility Reports, and the beginning and end dates of data collection. It shows that our data was collected before the surge in COVID-19 cases but just weeks after the national mandatory quarantine was put in place. Given that the recall period

of children under two years old (Celhay et al., 2019). However, in the case of the former, the transfers are paid only twice per year and, in the case of the latter, the transfers are paid upon the completion of the conditions for disbursement.

<sup>14</sup>The government later announced other cash transfer programs targeting people with school-age children enrolled in public schools and self-employed workers. The funds were not disbursed until late April, the end of our sample time period, and eligibility for these programs does not change discontinuously at the age of 60.

<sup>15</sup>The IDB/Cornell Coronavirus Survey was implemented in 17 countries across Latin America and the Caribbean.

<sup>16</sup>A detailed description of the data collection approach can be found in Botta, Hoffmann and Vera-Cossio (2020)

of the survey is at most the month preceding data collection, our responses capture information corresponding to the days following the implementation of the lockdown measures.

Table 1 illustrate the dramatic situation of households with at least one member between the age of 55 to 65 during the onset of the pandemic. It shows that across all income levels 68% of households experienced the closure of a family-owned business and 45% of households experienced a job loss. In addition, 52% of households report having enough cash in hand to cover a week's worth of expenses, and only 33% of households report having enough food reserves to cover meals for a week. In addition, 42% of households modified their diets and 18% experienced hunger. Further, over 85% of households report feeling stressed about the pandemic. These statistics may understate the dramatic situation during early stages of the pandemic because our data set captures information from wealthier and more educated households.

Finally, the vast majority of the respondents correspond to multi-generational households. Table 1 shows that the average age of the survey respondent was 34. In addition, around 95% of the responses of households with adults age 55 to 60 correspond to prime-age respondents. Thus, our dataset allows us to study how a benefit provided to the elderly relates to household-level outcomes, and whether labor-market shocks to prime-age household members are attenuated by the benefits received by the elderly.

#### IV. Empirical Strategy

To identify the causal effects of the program, we exploit the discontinuity that arises from the fact that the sole eligibility criterion for receiving program benefits is age. As of April 1, 2020, adults who turned 60 in March 2020 became eligible to receive transfers from the program during April, while marginally younger adults were ineligible to receive the noncontributory pension. To identify eligible households in our survey, we collected information on the month and year of birth of the oldest adult in the respondent's household, conditional on the respondent reporting that at least one member of the household was 55 years old or older at the time of data collection (April 2020). Thus, our empirical design compares outcomes of households whose oldest member just became eligible for the program during the onset of the pandemic in Bolivia to those of households whose oldest member of the program was only months away from becoming eligible.

The effect of being eligible for the program on outcome  $y_i$  can be modeled in a regression discontinuity framework as:<sup>17</sup>

<sup>17</sup>We focus mostly on household outcomes as our sample is mostly composed of multi-generational households, and there is evidence of important within household distributional effects in the context of non-contributory pension programs (Duflo, 2000, 2003).

$$(1) \quad Y_i = \beta_0 + \beta_1 T_i + \theta_1 (Age_i - c) + \theta_2 T_i \times (Age_i - c) + \gamma x_i + \epsilon_i$$

where  $Age_i$  is the age of the oldest adult in the household of respondent  $i$  on March 30, 2020;  $c$  is the cutoff age of 60 in March 2020;  $x_i$  is a vector of demographic household and respondent characteristics that are unlikely to vary due to the program; and  $\epsilon_i$  is an error term. The vector  $x_i$  includes the respondents' age, gender, civil status (single vs. married or cohabiting), and educational attainment (primary, secondary, college, or graduate studies), as well as household size and the number of school-age children in the household.  $T_i = \mathbf{1}[Age_i \geq c]$  is an indicator of whether the age of the oldest member of household  $i$  is above the age cutoff. We use a linear specification of the running variable around the cutoff and allow for different slopes on either side of the cutoff. We also report estimates using a second-order polynomial in Section V.D.<sup>18</sup>.

We estimate equation (1) using triangular kernels that assign a higher weight to observations of households closer to the eligibility cutoff, and conduct inference using robust standard errors. We report results using different bandwidths, including optimally selected bandwidths using Cattaneo, Jansson and Ma (2019)'s approach.

The parameter of interest,  $\beta_1$ , captures the reduced-form (RF) effect of being eligible for the program or the intention-to-treat (ITT) effect of the program on household and respondent outcomes. As eligibility is based on the age of the oldest person in the household in March 2020, our estimates capture the local average treatment effect of being included in the cash-assistance program at the onset of the pandemic and the beginning of mobility-restriction policies in Bolivia.

#### A. Threats to identification

*Manipulation.* The validity of an RD design requires that individuals cannot perfectly manipulate the assignment variable, which in our setting is the oldest household member's age at the onset of the pandemic. There are two reasons why manipulation is unlikely in the Bolivian setting. First, we study the impact of program eligibility during the onset of the pandemic. Given the unanticipated nature of the pandemic, ex ante there was no incentive to manipulate eligibility in order to become eligible during the time period used in our analysis. Second, changes to official date of birth records are rare at any time, and extremely unlikely during this period, due to the closure of government

<sup>18</sup>We do not use survey weights to weight the observations in our sample. Although our survey sample is not representative of the Bolivian population, the internal validity of the research design does not rely on the use of weights. We discuss the implications of using a non-representative sample in terms of the interpretation of the effects in section VII



offices in late March 2020.

As we rely on self-reported data, a similar threat to validity is that becoming eligible for the program during the onset of the pandemic may have caused differential response rates of households around the age 60 cutoff. Appendix Figure A1 reports the distribution of observations around the cutoffs, focusing on households with adults 55 to 65 years old, and shows no evidence of discontinuous changes at the cutoff according to the (McCrary, 2008) test for manipulation. In addition, Appendix Table A2 shows that we cannot reject the null hypothesis that there are no discontinuities in the distribution around the cutoff using the manipulation test following Cattaneo, Jansson and Ma (2019) (p-value=0.14 and p-value=0.55 with and without adjusting for bandwidth selection).

*Balance.* We also test for discontinuities in demographic characteristics around the cutoff using different bandwidths to estimate (1). Appendix Table A3 shows that, at a 5% confidence level, there are no significant differences around the cutoff. However, we did find some differences that are significant at 10%, but none of them persist across bandwidths. In addition, for each estimation bandwidth, we are unable to reject the null hypothesis that all the coefficients in each column are jointly zero. We show in Section V.D that, besides changes in statistical power, our RD estimates are very similar with and without demographic controls in the regression specification.

## V. Effects of the program on resilience, food security, and stress

### A. Program participation

Figure 2A graphs the relationship between self-reported program participation and month and year of birth. The running variable is the age of the oldest person in the household as of March 2020, normalized with respect to the eligibility cutoff of 60 years old as of March 30, 2020. Our age variable is recorded at the monthly level based on information on year and month of birth; each observation in the graph is the share of households that report receiving Renta Dignidad in three-month age bins. The solid line is a linear fit estimated on each side of the cutoff using triangular weights over the 24-month bandwidth. The figure shows a sharp increase in the share of households that report receiving transfers as part of the program around the cutoff. Appendix Figure A2 reports similar graphs using a 24-month bandwidth and nonparametric fits around each side of the cutoff.

Column 1 in Panel B of Table 3 shows the results of RD estimates using the specification in equation (1) over a 24-month bandwidth. There is a sharp, precise jump in the probability of receiving program resources at the cutoff. The increase in program participation is 20 percentage

points. Panels B, C, and D show that this increase does not vary with respect to the choice of bandwidth. Note that the probability of being a program beneficiary does not jump from zero to one. The transfers could only be cashed out in person at branches of Banco Union (the state-owned bank), and the mobility restrictions and related public health concerns may have discouraged the elderly from visiting the bank branches to collect their transfers or visiting government offices to enroll in the program.<sup>19</sup>

Table A4 shows the correlates of program participation with demographic characteristics and perceptions related to social distancing measures for different sub-samples. In the case of eligible households (age 60 to 65), column 3 shows that program participation is lower for households with children age 6 and younger and that the likelihood of program participation is increasing with the number of adult household members. This is likely because it is more difficult to leave the house with young children and because the government allowed other adult family members to retrieve the transfer to help protect the elderly from the virus. Column 3 also shows that agreement with the statement that it is acceptable to visit a bank at the onset of the pandemic increases the likelihood of program participation. This suggests that some eligible beneficiaries may have chosen not to cash out the benefits of the program in April 2020 to avoid exposure to the virus.<sup>20</sup> Column 4 reports OLS estimates only including the variables that were selected through the LASSO using a penalty parameter chosen through 10-fold cross-validation, and shows that these three key variables were selected as predictors of compliance among the regressors included in column 3.<sup>21</sup>

Given the logistical barriers affecting the take up of the transfer in the midst of a crisis, we focus our analysis on intention-to-treat estimates (ITT) of the program.

### *B. Effects on financial resilience, food security, and stress*

In this section, we report RD estimates of the ITT effect of becoming eligible for the transfer during the onset of the pandemic on households' ability to secure funds to pay for necessities, food security, and stress.

To measure financial resilience, we followed Demirgüç-Kunt et al. (2020) and asked respondents about their households' ability to cover emergency expenses.<sup>22</sup> To measure the ability of households to cover basic expenses, we asked households to report whether they had enough resources to cover

<sup>19</sup>As mentioned in Section II, there is an option for home delivery of the funds, which is only available to adults with physical impairments. These adults tend to be older and less likely to be included in the analysis bandwidth.

<sup>20</sup>Beneficiaries could accumulate up to three months of payments before the payments were reverted.

<sup>21</sup>In our data, program participation among ineligible households is likely due to random recall error in on transfer reception by the survey respondent.

<sup>22</sup>Specifically, we asked whether their households could come up with funds to cover emergency expenses equivalent to 0.5, 1 and 1.5 minimum monthly wages. We randomize the amount with equal probability in the survey.

regular household expenses for 1 to 3 days, 4 to 7 days, 1 to 2 weeks, 3 to 4 weeks, or more than a month, in the event that they lost their main source of income. Likewise, to measure the ability of households to secure their food supply, we asked the respondents to report whether they had enough food stock to cover meals for 1 to 3 days, 4 to 7 days, 1 to 2 weeks, 3 to 4 weeks, or more than a month. We then constructed indicators of whether households had enough resources to cover more than a week's worth of necessities and more than a week's worth of meals.

We also analyze whether the program protected households from going hungry due to lack of food during the onset of the pandemic and from having to reduce the quality of their diet relative to pre-pandemic periods.<sup>23</sup> Table 1 shows that 18% of respondents reported that someone in their households went hungry during the week preceding data collection, and that 42% of respondents reported that their household was eating less healthy.<sup>24</sup> Finally, to quantify the effects of the program on stress, we exploit self-reported information regarding the respondents' subjective perceptions of stress due to the pandemic and due to an increased health risk for the respondent's household members.<sup>25</sup>

We create three indexes to summarize the effects of the program on financial resilience, food security, and stress. For complex, multidimensional issues, such as food security, it is best practice to use multiple survey questions to capture different aspects of food security and combine these aspects into one measure of food security.<sup>26</sup> Combining multiple aspects of food security into one measure allows us to better capture the overall phenomenon of food security as households may respond to food insecurity along different margins.

Each index is the unweighted mean of the individual components. The financial resilience index has two components: the probability of being able to cover an unexpected financial shock and the probability of having enough resources to cover a week's worth of expenses. Higher values of the index capture higher household financial resilience. The food security index contains three components: the probability that a household has enough food in stock to cover a week's worth of meals, the probability that no household member experienced hunger, and the probability that the household does not report eating less healthily. In this way, higher values of the food security index imply greater food security. The stress index includes two components: an indicator of whether

<sup>23</sup>Specifically, we asked whether someone in the household went hungry during the prior week for lack of food.

<sup>24</sup>We asked respondents whether they agreed with the statement that he/she is eating less healthy than normal using a 5-level Likert scale. We then coded an indicator of 1 if the respondent somewhat or strongly agreed with the statement, and 0 otherwise.

<sup>25</sup>Respondents were asked about their level of agreement with the following two statements: "I feel nervous about the current situation" and "I feel worried for the health of the members of my household". Answers were collected using a 5-level Likert scale. We then coded an indicator of 1 if the respondent somewhat or strongly agreed with the statement, and 0 otherwise.

<sup>26</sup>For example, the Household Food Insecurity Access Scale used by USAID seeks to capture uncertainty or anxiety over food, perceptions that food is of insufficient quantity, perceptions that food is of insufficient quality, and reductions in food intake, among other dimensions of food insecurity (Coates, Swindale and Bilinsky, 2007).

the respondent feels stress due to the pandemic and an indicator of whether the respondent feels stress related to the health of his/her family.

We present the results of estimating equation 1 using these three indexes as outcome variables in table 2. Focusing on Panel B, which displays the results using a 24-month bandwidth, eligibility for the program increases financial security and food security while decreasing stress. All three effects are statistically significant and the results are robust to the choice of bandwidth.

Next, we look at the impact of the program on the individual components of the three indexes. We find that becoming eligible for the cash transfer significantly increases financial resilience. Figures 2B and 2C depict the discontinuous increases in the probability that households report having enough resources to cover emergency expenses and more than a week's worth of basic expenses. Column 2 in Table 3 shows that, depending on the bandwidth choice, beneficiary households are more likely to be able to come up with resources to cover unexpected expenses, although in some cases, this effect is imprecisely estimated. Column 3 shows that, depending on the bandwidth, becoming eligible to Renta Dignidad during the onset of the pandemic increased the probability of having enough resources to cover more than a week of expenses by 0.10 to 0.13 percentage points. The effects represent over 20% of the mean for marginally ineligible households.

Becoming eligible for the program during the onset of the pandemic improved food security relative to marginally ineligible households. Figure 2D shows a discontinuous increase in the probability that households report having enough food on hand to cover more than a week's worth of meals. Column 4 in Table 3 shows that, depending on the bandwidth, becoming eligible to Renta Dignidad during the onset of the pandemic increased the probability of having a large enough stock of food to cover more than a week of meals by 0.06 to 0.08 percentage points. The effects represent over 20% of the mean for marginally ineligible households.

Consistent with our results on food availability, Figure 2E shows that there is a discontinuous decline in the probability that someone in the household experienced hunger. Column 5 in Table 3 shows that, depending on the bandwidth, the probability of experiencing hunger during the pandemic is reduced by 0.08 to 0.12 percentage points due to the program. These effects account for 39 to 56% reductions with respect to the probability of experiencing hunger among marginally ineligible households.

Eligibility for the program also protected households from reductions in the quality of their diet. Figure 2F shows that there is a reduction in the probability that a household reported eating less healthy during the pandemic. Column 6 of Table 3 shows that although the decline is only significant at 10%, it is economically meaningful, accounting for approximately 10–15% of the

average among marginally ineligible households.

We also analyze the effect of the program on respondents' subjective perceptions of stress during the pandemic but find no strong evidence of declines in stress due to the program. For a 24-month bandwidth, Figures 2G and 2H show that the program did not significantly reduce stress related to the pandemic or related to the health of their family members. However, column 7 of Table 3 shows that, for some bandwidths, the program seems to reduce the respondents' perception of stress due to the pandemic.<sup>27</sup>

Overall, becoming eligible for cash benefits during the onset of the pandemic increased household resilience, helping households avoid changes in their food consumption and nutrition. Thus, having access to cash aid early in the pandemic may help prevent reductions in the stock of human capital because declines in nutrition can lower worker productivity (Schofield, 2019; Dasgupta and Ray, 1986) and affect long-term educational outcomes in the case of children (Maluccio et al., 2009).

### *C. Effects during the pre-crisis period*

In regular times, entrance into the program could be interpreted as an expected permanent increase in income. In the absence of binding liquidity constraints, households should adjust their food consumption very little at the time that they become beneficiaries. We find no evidence of discontinuous changes around the eligibility cutoff in the probability that a household member went hungry using pre-pandemic data. Figure 3 replicates our empirical strategy using data from the 2016-2018 Bolivian Household Surveys, and compares the effects of program eligibility on the probability that at least one household member went hungry during the three months before the data collection.<sup>28</sup>

The estimated impact of the program on hunger during 2016-2018 is not directly comparable to its estimated impact at the onset of the crisis because the amount of the transfer increased, the populations of which the surveys are representative may differ, and the survey questions capture different recall periods.<sup>29</sup> However, the impact of the program on hunger in 2016-2018 can serve as a benchmark. In contrast to the economically and statistically significant program effects on hunger using the data collected during the onset of the pandemic, we find no evidence that becoming eligible for the program reduced hunger during pre-pandemic years.

Table 4 reports point estimates for different bandwidths. In all cases, the point estimates have

<sup>27</sup>In this case, we are unable to reject the joint null hypothesis that the program had an effect on both stress measures.

<sup>28</sup>The field work associated with household surveys is usually conducted during the last quarter of each year.

<sup>29</sup>The reference period in the case of the COVID-19 survey corresponds to the week before the interview (early April 2020) while the reference period for the household survey data is the three months before the interview, generally September to November of each year.

the opposite sign of the effects during the pandemic. Further, 95% confidence intervals rule out declines in hunger during pre-pandemic years of the size of the impact estimated during the onset of the pandemic. This contrast emphasizes the importance of quickly delivering resources during the onset of the pandemic and the program’s ability to attenuate the effects of severe economic shocks.

#### *D. Robustness*

**Exclusion of covariates.** Table A5 reports estimates of our main results without including covariates in the RD regressions for different bandwidth choices. The point estimates are consistent with our main specification.

**Higher-order polynomials.** Appendix Table A6 shows that allowing for quadratic trends in the running variable does not change the point estimates, but does increase the standard errors. The results are also robust to using flexible nonparametric estimates on each side of the cutoff (see Appendix Figure A2).

**Placebo exercises.** Finally, we conduct two placebo exercises by moving the cutoff 24 months before and after the cutoff of 60 years of age in March 2020. Panel A of Appendix Table A7 compares households whose oldest member became eligible for the program 2 years before the onset of the pandemic to those whose oldest member, at that point in time, would have been marginally ineligible for the program. This exercise should yield null or small differences, because those household members that were ineligible in March 2018 still became eligible long before our data collection period. Reassuringly, we find no evidence of statistically significant or economically substantial differences between these two groups. Panel B of Appendix Table A7 compares differences in outcomes between households whose oldest member will become eligible for the program 2 years in the future (March 2022) to those whose oldest member would be marginally ineligible at that time. There are no significant differences between these groups in the 8 outcomes that we study.

## **VI. Heterogeneity by exposure to labor-market shocks at the onset of the pandemic**

In our data set, ninety-five percent of the households around the eligibility cutoff were multi-generational households—households in which prime-age and elderly members cohabit. In multi-generational households, although program beneficiaries are less likely to actively participate in the labor market, these households are still exposed to labor-market shocks to prime-age household members. For 65% of households in our sample, the pandemic led to large labor market shocks that triggered income reductions. We use data on closures of small family-owned businesses—a proxy

for self-employment—and job losses during the onset of the pandemic to analyze the extent to which the effects of the program varied with exposure to labor market shocks. Appendix Figure A3 Panel A shows that low- and middle-income households were substantially more likely to experience business closures and job loss during the weeks preceding the pandemic.

We combine this cross-household variation in the exposure to shocks induced by the pandemic with our RD approach to estimate the following specification:

$$(2) \quad Y_i = \beta_0 + \beta_1 T_i + \beta_2 T_i \times Shock_i + \beta_3 Shock_i \\ + \theta_1 (Age_i - c) + \theta_2 T_i \times (Age_i - c) + X_i \Gamma + \epsilon_i$$

where  $Shock_i$  is an indicator of whether any household member lost their livelihood during the month preceding data collection.<sup>30</sup> We focus on the loss of livelihood related to closures of family-operated businesses and job losses in Panels A and B of Table 5, respectively. The ITT effect of the program, regardless of whether a household experienced a labor-market shock, is captured by  $\beta_1$  (the direct effect).  $\beta_2$  captures the differential effect in the case of households in which a household member lost their livelihood during the pandemic (the smoothing effect). For ease of exposition, we report estimates using a bandwidth of 24 months before and after the program and report results using other bandwidths in the appendix.

Estimates of equation 2 deliver valid comparisons to the extent that the exposure to shocks is exogenous with respect to changes in program eligibility. Column 1 of Table 5 reports RD estimates of equation 1 of the effect of the program on experiencing business closures (Panel A) and job losses (Panel B). Reassuringly, neither outcome varies discontinuously around the cutoff for program eligibility.

Column 4 of Panel A shows that program eligibility increased the likelihood that households had enough resources to cover their needs for one week and that this effect was smaller for households that closed their businesses, but this difference is not robust to alternative bandwidths (see Appendix Table A9). Likewise, we find that the program improved the ability of households to stock up on food supplies, but we fail to detect heterogeneous effects by business closure (see Column 5).

We find strong evidence that the program enabled the hardest-hit households to maintain a basic level of food consumption. Column 6 shows that business closures are linked to an increase

<sup>30</sup>We randomly varied the recall period of the questions related to loss of livelihoods across respondents. We considered three recall periods: the prior week, the prior two weeks, and the prior four weeks.

in the probability of reporting that a household member went hungry, and that this increase is attenuated by half in the case of households that became eligible for the program during the onset of the pandemic. Column 7 suggests that program eligibility reduced the likelihood of reporting a deterioration in diet quality. In the case of households that closed their businesses, program eligibility did not have this positive impact on diet quality, suggesting a substitution between quantity and quality of nutrition. Note that these effects are found despite lower take-up rates among households that experienced business closures (see Column 2). Indeed, panel A in Appendix Table A9 shows that the results are robust to controlling for predicted take-up, estimated using the predictive model in column 4 of Appendix Table A4, interactions of predicted takeup and shock exposure, and interactions of predicted take-up and program eligibility.

In addition, Column 9 suggests that, relative to households that did not close their businesses due to the pandemic, the program lead to declines in stress related to the health status of family members. This set of results is robust across different bandwidths (see Appendix Table A9). Overall, it appears that the program’s impacts for the most dire outcomes are concentrated among households that experienced a business closure—households that probably faced stronger liquidity constraints during the onset of the pandemic, while the impacts for less dire outcomes are experienced more broadly.<sup>31</sup>

To quantify the importance of this attenuation effect, we use the estimates in Column 5 of Panel A of Table 5 to compute the share of the average effect of the program on the probability of going hungry that is driven by households that experienced business closures. We multiply the effect of the program for households that closed a business ( $\beta_1 + \beta_2 = -0.03 - 0.09 = -0.13$ ) by the share of households that experienced a business closure ( $Shock = 0.68$ ) and divide it by the average effect of the program ( $\beta = \beta_1 + \beta_2 Shock = -0.033 - 0.097 \times 0.68 = -0.10$ ). The effects on households that experienced business closures during the onset of the pandemic accounts for 89% of the program’s total effect on the probability of going hungry and suggests that the program was crucial for households that experienced large labor-market shocks.

The heterogeneous effects are driven by shocks related to the closure of a family-owned business during the pandemic (Panel A). In Bolivia 68% of working-age adults are self-employed, and 68% of our sample reported closing a family-owned business at the onset of the pandemic.<sup>32</sup> We do not find evidence of heterogeneous effects when we use job loss as a proxy for economic shocks (Panel

<sup>31</sup>Appendix Table A8 displays the results of our heterogeneity analysis using the three indexes as outcomes. When using the indexes as outcomes, none of the heterogeneous effects of the program on households that closed a family business are statistically significant at conventional levels which is consistent with evidence of substitutions between quantity and quality for households that experienced business closures.

<sup>32</sup>Data from the World Bank’s World Development Indicators show that for 2019, the share of self-employed workers in Bolivia was 68%.



B). Forty-three percent of our sample reported a job loss at the onset of the pandemic. Appendix Figure A3 Panel A shows the closure of family-owned businesses and job losses by pre-pandemic income.

Our results underscore the importance of noncontributory pensions in attenuating labor market shocks affecting multi-generational households. In regular times, one would expect within-household substitution of labor supply to partially smooth out the effects of idiosyncratic labor market shocks experienced by prime-age household members. During the onset of the COVID-19 pandemic, households experienced a systemic shock that disrupted labor markets and limited the scope of within-household substitution, expanding the importance of the program by assisting households that experienced a recent business closure in securing a basic level of food consumption.

## VII. Heterogeneity by pre-pandemic income

During the onset of the pandemic, low-income households experienced business closures and job losses at high rates (see Appendix Figure A3 Panel A), and several middle-income households transitioned into lower income categories (see Appendix Figure A3 Panel B). We exploit the fact that eligibility for the Bolivian program is not based on income to analyze the impacts of the program across these key income groups.

Table 6 reports RD estimates corresponding to equation (1) for each pre-pandemic income group using a bandwidth of 24 months before and after the cutoff. In Column 3, we observe larger point estimates of the effect of the program on the availability of funds to cover a week's worth of expenses in the subsample of low-income households, for which the transfer represents a larger share of household income. Among low-income households, the program was also more effective at reducing the probability that somebody in the household went hungry. Overall, the larger impacts of the program were focused on low-income households. These results were not driven by different take-up in the case of lower-income households as there are no significant differences in the effects of program eligibility on transfer reception between income groups (see column 1) and controlling for predicted compliance does not affect the magnitude of the point estimates (see Appendix Table A10).

The previous results suggest that restricting eligibility to households with low pre-pandemic income could have increased the program's overall impact. However, during periods with systemic shocks, many households experienced income reductions. Appendix figure A3B shows the leftward shift of the income distribution during the onset of the pandemic. Narrow targeting based on proxies of the permanent component of income, which might be hard to timely update during crises, may

exclude many middle- or high-income households that are vulnerable to sliding into poverty.

We estimate equation (2) by pre-pandemic income groups. We find that the program substantially attenuated the impacts of business closures on the probability of going hungry in middle-income households (see Column 6 in Panel B of Appendix Table A11).

Our results suggest that there could be important unintended consequences of preexisting cash aid programs with broad coverage during crises when governments face the challenge of rapidly expanding social programs. In the case of the Bolivian noncontributory pension program, the program quickly provided support to vulnerable sub-populations: low-income households, and middle-income households that experienced a business closure induced by the pandemic. This implies that our estimated impacts of the program may underestimate the true effect of the program at the onset of the crisis. Compared to a representative survey, our sample is more educated, implying that lower-income households for whom we estimate larger positive impacts of the program are likely to be underrepresented in our sample.

### VIII. Policy Implications and Conclusion

Amid the coronavirus pandemic, some countries have implemented near-universal programs, while others have applied narrow targeting methods. One key question related to the effectiveness of near-universal programs is whether the impacts across all income levels are sufficient to justify their broad coverage, or whether the impacts of these programs could be magnified through targeting (Banerjee, Niehaus and Suri, 2019).

We find that an ongoing near-universal noncontributory pension program in Bolivia had important positive impacts on resilience and food security, with particularly large impacts for low-income households and also for middle-income households that experienced a large labor market shock. These impacts are observed despite the fact that not all eligible households were able to quickly cash out the transfers, which suggests that the impacts could have been magnified by minimizing logistical issues affecting the delivery.

Our results suggest that narrowly targeting cash transfers to the poor would miss the positive consumption-smoothing impacts for middle-income households that are vulnerable to falling into poverty due to labor market shocks. The evidence from Bolivia suggests that, during an economic crisis, an established, near-universal noncontributory pension program can quickly achieve the same primary goals as a social safety net composed of targeted transfers to the poor and an UI program. Although there is room for improvement in delivery,<sup>33</sup> given the potential delays in

<sup>33</sup>In our sample, only 53% of eligible households quickly collected their transfers, which could affect the cost-effectiveness

the implementation of new social programs which could also face delivery issues, strengthening preexisting programs may lead to a timely delivery of financial relief to households during the coronavirus crisis.

## REFERENCES

- Alatas, Vivi, Abhijit Banerjee, Rema Hanna, Benjamin A. Olken, Ririn Purnamasari, and Matthew Wai-Poi.** 2016. “Self-Targeting: Evidence from a Field Experiment in Indonesia.” *Journal of Political Economy*, 124(2): 371–427.
- Ardington, Cally, Anne Case, and Victoria Hosegood.** 2009. “Labor supply responses to large social transfers: Longitudinal evidence from South Africa.” *American economic journal: Applied economics*, 1(1): 22–48.
- Baker, Scott R, R. A Farrokhnia, Steffen Meyer, Michaela Pagel, and Constantine Yannelis.** 2020. “Income, Liquidity, and the Consumption Response to the 2020 Economic Stimulus Payments.” National Bureau of Economic Research Working Paper 27097.
- Banerjee, Abhijit, Esther Duflo, Clement Imbert, Santhosh Mathew, and Rohini Pande.** 2016. “E-governance, Accountability, and Leakage in Public Programs: Experimental Evidence from a Financial Management Reform in India.” National Bureau of Economic Research Working Paper 22803.
- Banerjee, Abhijit, Michael Faye, Alan Krueger, Paul Niehaus, and Tavneet Suri.** 2020. “Effects of a Universal Basic Income during the pandemic.” UC San Diego Working Paper.
- Banerjee, Abhijit, Paul Niehaus, and Tavneet Suri.** 2019. “Universal Basic Income in the Developing World.” *Annual Review of Economics*, 11(1): 959–983.
- Borrella Mas, Miguel Ángel, Mariano Bosch, and Marcello Sartarelli.** 2016. “Non-Contributory Pensions Number-Gender Effects on Poverty and Household Decisions.” Instituto Valenciano de Investigaciones Económicas, S.A. (Ivie) Working Papers. Serie AD.
- Bottan, Nicolas, Bridget Hoffmann, and Diego Vera-Cossio.** 2020. “The unequal burden of the COVID-19 pandemic: Evidence from 17 developing countries.” Inter-American Development Bank Discussion paper.

with which the program can deliver positive impacts.

- Busso, Matias, Juanita Camacho, Julian Messina, and Guadalupe Montenegro.** 2020. “The Challenge of Protecting Informal Households during the COVID-19 Pandemic: Evidence from Latin America.” Inter-American Development Bank Discussion Paper IDB-DP-780.
- Calonico, Sebastian, Matias D Cattaneo, and Max H Farrell.** 2019. “Optimal bandwidth choice for robust bias-corrected inference in regression discontinuity designs.” *The Econometrics Journal*, 23(2): 192–210.
- Case, Anne, and Angus Deaton.** 1998. “Large cash transfers to the elderly in South Africa.” *The Economic Journal*, 108(450): 1330–1361.
- Cattaneo, Matias D., Michael Jansson, and Xinwei Ma.** 2019. “Simple Local Polynomial Density Estimators.” *Journal of the American Statistical Association*, 0(0): 1–7.
- Celhay, Pablo, Sebastian Martinez, Julia Johannsen, and Cecilia Vidal.** 2019. “Can Small Incentives Have Large Payoffs? Health Impacts of a Cash Transfer Program in Bolivia.” *Economic Development and Cultural Change*, Forthcoming.
- Chetty, Raj, and Adam Looney.** 2006. “Consumption smoothing and the welfare consequences of social insurance in developing economies.” *Journal of Public Economics*, 90(12): 2351 – 2356.
- Chong, Alberto, and Monica Yáñez-Pagans.** 2019. “Not so fast! Cash transfers can increase child labor: Evidence for Bolivia.” *Economics Letters*, 179(C): 57–61.
- Coates, Jennifer, Anne Swindale, and Paula Bilinsky.** 2007. “Household Food Insecurity Access Scale (HFIAS) for Measurement of Household Food Access: Indicator Guide (v. 3).” Washington, D.C.: Food and Nutrition Technical Assistance Project, Academy for Educational Development.
- Cruces, Guillermo, and Marcelo Bérigolo.** 2013. “Informality and Contributory and Non-Contributory Programmes. Recent Reforms of the Social-Protection System in Uruguay.” *Development Policy Review*, 31(5): 531–551.
- Dasgupta, Partha, and Debraj Ray.** 1986. “Inequality as a Determinant of Malnutrition and Unemployment: Theory.” *The Economic Journal*, 96(384): 1011–1034.
- de Carvalho Filho, Irineu Evangelista.** 2008. “Old-age benefits and retirement decisions of rural elderly in Brazil.” *Journal of Development Economics*, 86(1): 129–146.

- Demirgüç-Kunt, Asli, Leora Klapper, Dorothe Singer, Saniya Ansar, and Jake Hess.** 2020. “The Global Findex Database 2017: Measuring Financial Inclusion and Opportunities to Expand Access to and Use of Financial Services.” *World Bank Economic Review*, 34(Supplement): 2–8.
- Dufo, Esther.** 2000. “Child health and household resources in South Africa: evidence from the old age pension program.” *American Economic Review*, 90(2): 393–398.
- Dufo, Esther.** 2003. “Grandmothers and granddaughters: old-age pensions and intrahousehold allocation in South Africa.” *The World Bank Economic Review*, 17(1): 1–25.
- Duryea, S, and M Robles.** 2016. *Pulso Social de America Latina y el Caribe 2016: realidades y perspectivas*. Inter-American Development Bank.
- Escobar, Federico, Sebastián Martínez, and Mendizabal.** 2013. *El impacto de la Renta Dignidad: política de redistribución del ingreso, consumo y reducción de la pobreza en hogares con personas adultas mayores*. Unidad de Análisis de Políticas Sociales y Económicas, Ministerio de Planificación.
- Fan, Elliott.** 2010. “Who benefits from public old age pensions? Evidence from a targeted program.” *Economic Development and Cultural Change*, 58(2): 297–322.
- Galiani, Sebastian, Paul Gertler, and Rosangela Bando.** 2016. “Non-contributory pensions.” *Labour Economics*, 38: 47–58.
- Galiani, Sebastian, Paul Gertler, and Rosangela Bando.** 2018. “The Effects of Non-Contributory Pensions on Material and Subjective Well Being.” *Economic Development and Cultural Change*, 0(ja): null.
- Hanna, Rema, and Benjamin A. Olken.** 2018. “Universal Basic Incomes versus Targeted Transfers: Anti-Poverty Programs in Developing Countries.” *Journal of Economic Perspectives*, 32(4): 201–26.
- Jack, William, and Tavneet Suri.** 2014. “Risk Sharing and Transactions Costs: Evidence from Kenya’s Mobile Money Revolution.” *American Economic Review*, 104(1): 183–223.
- Londoño-Vélez, Juliana, and Pablo Querubin.** 2020. “The Impact of Emergency Cash Assistance in a Pandemic: Experimental Evidence from Colombia.” Working Paper.
- Mace, Barbara J.** 1991. “Full Insurance in the Presence of Aggregate Uncertainty.” *Journal of Political Economy*, 99(5): 928–956.

- Maluccio, John A., John Hoddinott, Jere R. Behrman, Reynaldo Martorell, Agnes R. Quisumbing, and Aryeh D. Stein.** 2009. “The Impact of Improving Nutrition During Early Childhood on Education among Guatemalan Adults.” *The Economic Journal*, 119(537): 734–763.
- Max Roser, Hannah Ritchie, Esteban Ortiz-Ospina, and Joe Hasell.** 2020. “Coronavirus Pandemic (COVID-19).” *Our World in Data*. <https://ourworldindata.org/coronavirus>.
- McCrary, Justin.** 2008. “Manipulation of the running variable in the regression discontinuity design: A density test.” *Journal of Econometrics*, 142(2): 698 – 714. The regression discontinuity design: Theory and applications.
- Mena, Gary, and Werner L. Hernani-Limarino.** 2015. “Intended and Unintended Effects of Unconditional Cash Transfers: The Case of Bolivia’s Renta Dignidad.” Inter-American Development Bank IDB Publications (Working Papers) 7350.
- Muralidharan, Karthik, Paul Niehaus, and Sandip Sukhtankar.** 2016. “Building State Capacity: Evidence from Biometric Smartcards in India.” *American Economic Review*, 106(10): 2895–2929.
- Muralidharan, Karthik, Paul Niehaus, Sandip Sukhtankar, and Jeffrey Weaver.** 2018. “Improving Last-Mile Service Delivery using Phone-Based Monitoring.” National Bureau of Economic Research Working Paper 25298.
- Niehaus, Paul, Antonia Atanassova, Marianne Bertrand, and Sendhil Mullainathan.** 2013. “Targeting with agents.” *American Economic Journal: Economic Policy*, 5(1): 206–38.
- Peluffo, Maria Cecilia.** 2019. “Government Transfers to Elderly Women and Husbands’ Mortality.” University of Florida Working Paper.
- Ray, Debraj, and S. Subramanian.** 2020. “India’s Lockdown: An Interim Report.” National Bureau of Economic Research Working Paper 27282.
- Riley, Emma.** 2018. “Mobile money and risk sharing against village shocks.” *Journal of Development Economics*, 135: 43 – 58.
- Schofield, Heather.** 2019. “Ramadan Fasting and Agricultural Output.” University of Pennsylvania Working Paper.
- Townsend, Robert M.** 1994. “Risk and Insurance in Village India.” *Econometrica*, 62(3): 539–591.

**Vera-Cossio, Diego.** 2020. "Dependence or Constraints?: Cash transfers and labor supply."  
*Economic Development and Cultural Change*, Forthcoming.

## **IX. Figures and Tables**

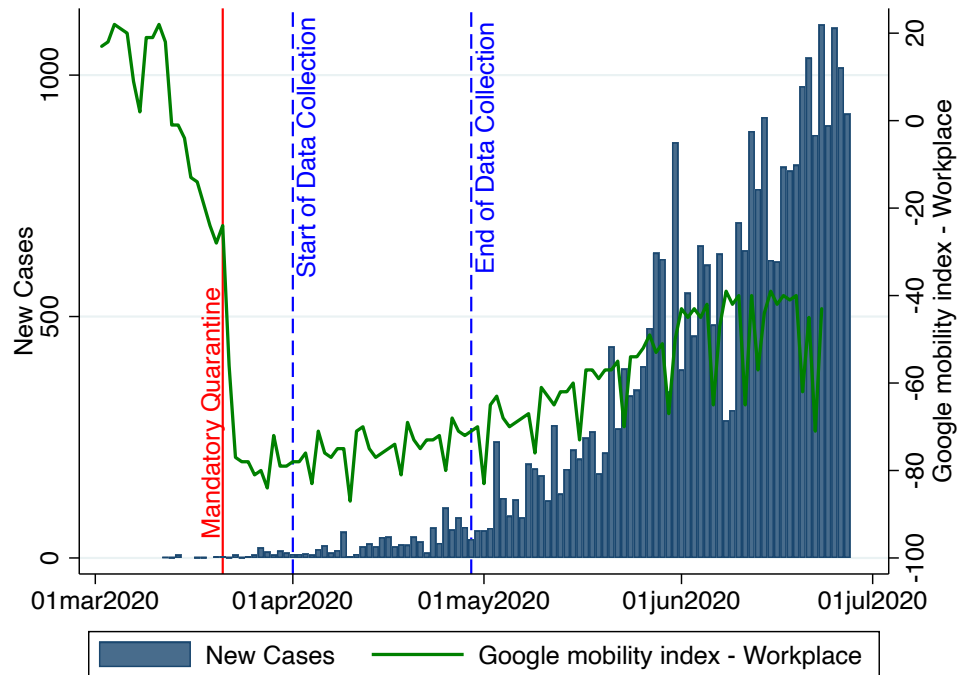

FIGURE 1. DATA COLLECTION TIMELINE AND THE SPREAD OF COVID-19 IN BOLIVIA

*Note:* Own calculations based on data from Max Roser and Hasell (2020) on COVID-19 cases in Bolivia over time, and the Google Mobility Report for mobility trends in the workplace for Bolivia. The Google mobility index shows the percentage change in mobility to geographic locations classified as workplaces relative to a baseline level.



TABLE 1—SUMMARY STATISTICS

|                                                 | N    | Mean  | Std. Dev. | Min | Max |
|-------------------------------------------------|------|-------|-----------|-----|-----|
| <i>Respondent's Characteristics</i>             |      |       |           |     |     |
| Gender (female)                                 | 5627 | 0.63  | 0.48      | 0   | 1   |
| Age                                             | 5627 | 34.82 | 11.86     | 18  | 79  |
| Marital/Civil status                            | 5627 | 0.37  | 0.48      | 0   | 1   |
| <i>Education (Respondent)</i>                   |      |       |           |     |     |
| None                                            | 5627 | 0.00  | 0.03      | 0   | 1   |
| Primary                                         | 5627 | 0.01  | 0.08      | 0   | 1   |
| Secondary                                       | 5627 | 0.14  | 0.35      | 0   | 1   |
| Technical/Vocational                            | 5627 | 0.20  | 0.40      | 0   | 1   |
| University                                      | 5627 | 0.52  | 0.50      | 0   | 1   |
| Graduate degree                                 | 5627 | 0.13  | 0.34      | 0   | 1   |
| <i>Household characteristics</i>                |      |       |           |     |     |
| Number of household members                     | 5360 | 5.45  | 2.87      | 1   | 16  |
| Number of children                              | 5627 | 0.93  | 1.22      | 0   | 5   |
| Days since of data collection (wrt 4/02/2020)   | 5627 | 21    | 7         | 0   | 29  |
| <i>Household Resilience</i>                     |      |       |           |     |     |
| Reduced Income                                  | 5236 | 0.17  | 0.38      | 0   | 1   |
| Can cover a shock                               | 5619 | 0.30  | 0.46      | 0   | 1   |
| Enough resources (>week)                        | 5627 | 0.52  | 0.50      | 0   | 1   |
| Enough food (>week)                             | 5627 | 0.33  | 0.47      | 0   | 1   |
| <i>Health (household level)</i>                 |      |       |           |     |     |
| Went hungry                                     | 5627 | 0.18  | 0.39      | 0   | 1   |
| Eats less healthy                               | 5303 | 0.42  | 0.49      | 0   | 1   |
| Stopped receiving med care                      | 3022 | 0.16  | 0.36      | 0   | 1   |
| <i>Stress(respondent)</i>                       |      |       |           |     |     |
| Stressed about the pandemic (overall situation) | 5555 | 0.87  | 0.34      | 0   | 1   |
| Stressed about the health of family members     | 5549 | 0.90  | 0.30      | 0   | 1   |
| <i>Livelihood loss (household level)</i>        |      |       |           |     |     |
| Lost job (past month)                           | 4458 | 0.43  | 0.50      | 0   | 1   |
| Closed business (past month)                    | 3860 | 0.68  | 0.47      | 0   | 1   |
| Had a job before pandemic                       | 5627 | 0.79  | 0.41      | 0   | 1   |
| Operated a business before pandemic             | 5627 | 0.69  | 0.46      | 0   | 1   |
| Had a job or operated business before pandemic  | 5627 | 0.91  | 0.28      | 0   | 1   |

*Note:* The table presents summary statistics using the sample of households in which the age of the oldest member is between 55 and 65 years old at the time the data was collected.

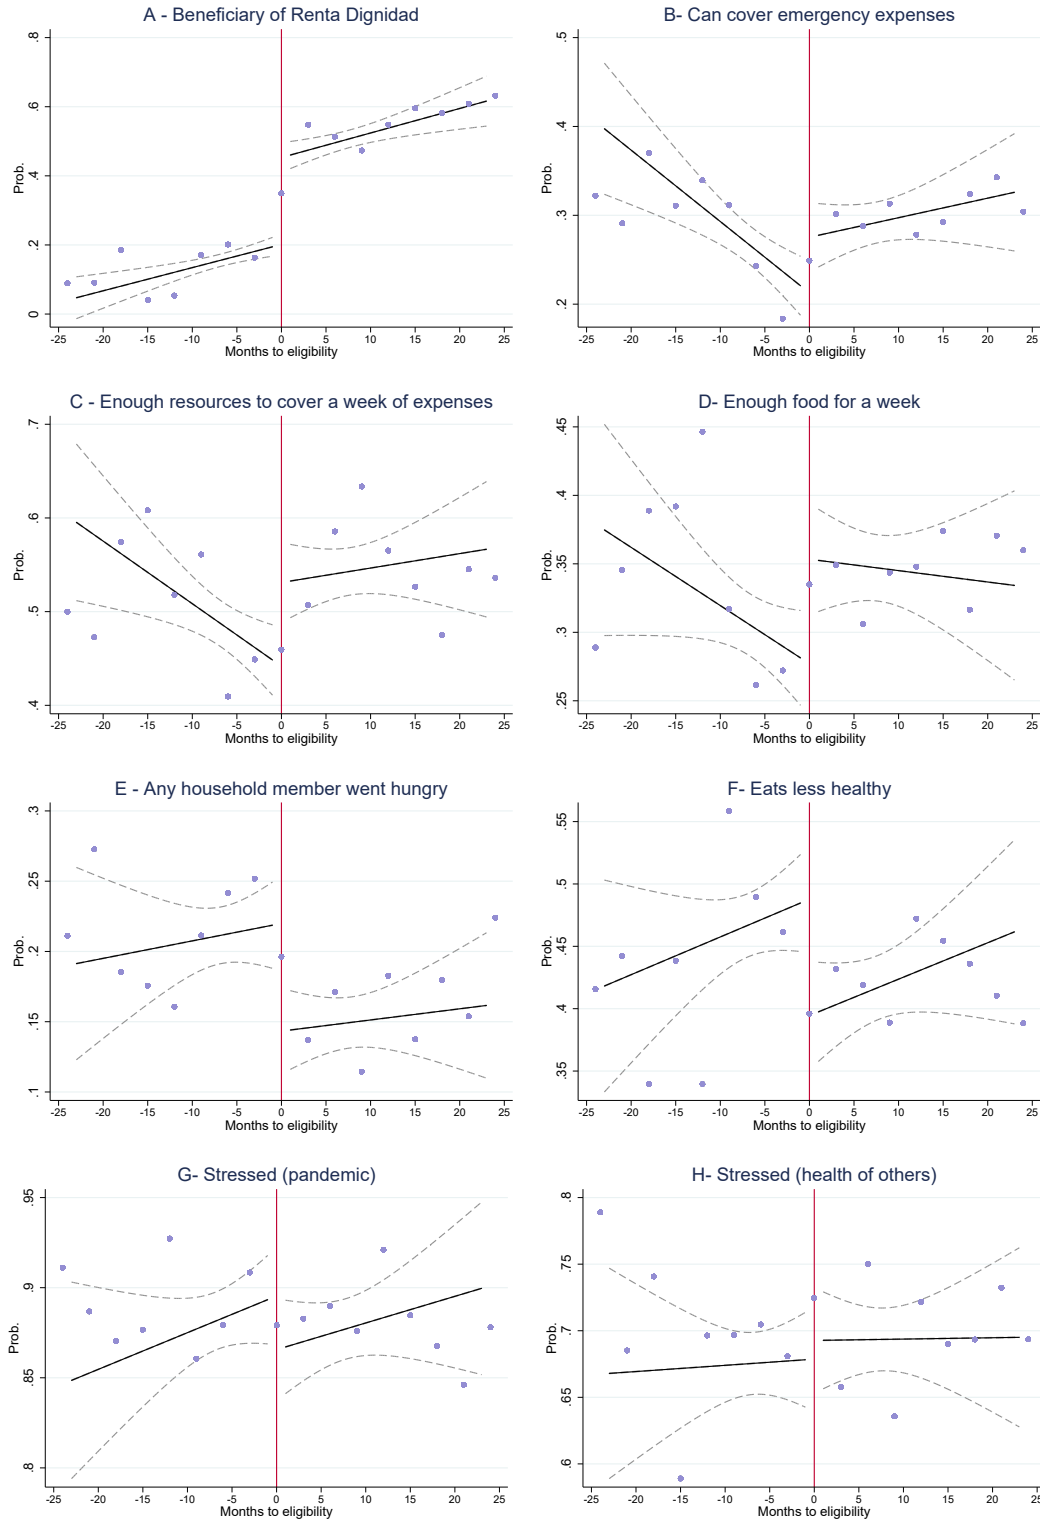

FIGURE 2. DISCONTINUITIES AT THE CUTOFF FOR MAIN OUTCOMES

*Note:* The figure reports means corresponding to three-month bins around the cutoff determining program eligibility, and linear fits on each side of the cutoff using triangular kernels and a 24-month bandwidth.

TABLE 2—EFFECTS ON HOUSEHOLD FINANCIAL RESILIENCE, FOOD SECURITY, AND STRESS - INDEXES

| <b>Panel A: Bandwith -12 to 12</b>  |                       |                       |                       |
|-------------------------------------|-----------------------|-----------------------|-----------------------|
|                                     | Resilience<br>(1)     | Food security<br>(2)  | Stress<br>(3)         |
| Above cutoff                        | 0.0971**<br>(0.0426)  | 0.0983***<br>(0.0348) | -0.0566*<br>(0.0301)  |
| Mean (Below cutoff)                 | 0.35                  | 0.47                  | 0.92                  |
| N                                   | 1183                  | 1183                  | 1172                  |
| <b>Panel B: Bandwith -24 to 24</b>  |                       |                       |                       |
| Above cutoff                        | 0.0933***<br>(0.0308) | 0.0839***<br>(0.0250) | -0.0359*<br>(0.0212)  |
| Mean (Below cutoff)                 | 0.37                  | 0.46                  | 0.91                  |
| N                                   | 2085                  | 2085                  | 2067                  |
| <b>Panel C: Bandwith -36 to 36</b>  |                       |                       |                       |
| Above cutoff                        | 0.0706***<br>(0.0259) | 0.0674***<br>(0.0208) | -0.0189<br>(0.0174)   |
| Mean (Below cutoff)                 | 0.38                  | 0.45                  | 0.91                  |
| N                                   | 3056                  | 3056                  | 3031                  |
| <b>Panel D: Optimal Bandwidth</b>   |                       |                       |                       |
| Above cutoff                        | 0.0919**<br>(0.0398)  | 0.0897***<br>(0.0280) | -0.0549**<br>(0.0261) |
| Mean (Below cutoff)                 | 0.35                  | 0.46                  | 0.91                  |
| Number of observations (total)      | 1327                  | 1688                  | 1455                  |
| Bandwidth (-/+)                     | 13.9                  | 19.0                  | 15.9                  |
| Number of obs (left of the cutoff)  | 836                   | 998                   | 894                   |
| Number of obs (right of the cutoff) | 596                   | 818                   | 676                   |

\*\*\* $p < 0.01$ , \*\* $p < 0.05$ , \*\* $p < 0.1$ 

*Note:* The table reports RD estimates corresponding to equation (1). Results for each outcome are reported in each column. All regressions include linear trends of the running variable on each side of the cutoff, as well as demographic controls, state fixed effects, and date-of-data-collection fixed effects. Demographic controls include the respondents' age, gender, civil status (single vs. married or cohabiting), and educational attainment (primary, secondary, college, graduate studies). We also control for household size and the number of school-age children in the household. Robust standard errors are reported in parentheses. Triangular kernels are used in all regressions. Panel A, B and C report results using bandwidths of 12, 24 and 36 months before and after the eligibility threshold (60 years old in March 2020). Panel D reports RD estimates using the bandwidth selection procedure of Calonico, Cattaneo and Farrell (2019). Each dependent variable is an index computed by taking an unweighted average of each individual outcome in a given category. Resilience includes the probability of being able to cover an unexpected financial shock and the probability of having enough resources to cover a week's worth of expenses. Food security includes the probability that a household has enough food in stock to cover a week's worth of meals, the probability that no household member experienced hunger, and the probability that the household does not report eating less healthily (such that higher values imply higher food security). Stress includes indicators of whether the respondent feels stressed due to the pandemic and due to the health of her/his family members.

TABLE 3—EFFECTS ON HOUSEHOLD FINANCIAL RESILIENCE, FOOD SECURITY, AND STRESS

|                                           | Received Transfer    |                          | Resilience           |                      | Food security          |                      | Stress                |                     |
|-------------------------------------------|----------------------|--------------------------|----------------------|----------------------|------------------------|----------------------|-----------------------|---------------------|
|                                           | Can cover a shock    | Enough resources (>week) | Enough food (>week)  | Went hungry          | Eats less healthy      | Stressed (pandemic)  | Stressed (health)     |                     |
|                                           | (1)                  | (2)                      | (3)                  | (4)                  | (5)                    | (6)                  | (7)                   | (8)                 |
| <b>Panel A: Bandwidth -12 to 12</b>       |                      |                          |                      |                      |                        |                      |                       |                     |
| Above cutoff                              | 0.206***<br>(0.0560) | 0.0720<br>(0.0478)       | 0.122**<br>(0.0569)  | 0.101*<br>(0.0559)   | -0.123***<br>(0.0451)  | -0.0675<br>(0.0609)  | -0.0729**<br>(0.0371) | -0.0400<br>(0.0340) |
| P-val (F-test of coefs=0 within category) |                      |                          | 0.06                 |                      | 0.01                   |                      | 0.12                  |                     |
| Mean (Below cutoff)                       | 0.19                 | 0.24                     | 0.45                 | 0.29                 | 0.22                   | 0.47                 | 0.90                  | 0.94                |
| N                                         | 1183                 | 1183                     | 1183                 | 1183                 | 1183                   | 1110                 | 1167                  | 1171                |
| <b>Panel B: Bandwidth -24 to 24</b>       |                      |                          |                      |                      |                        |                      |                       |                     |
| Above cutoff                              | 0.213***<br>(0.0393) | 0.0595*<br>(0.0353)      | 0.127***<br>(0.0406) | 0.0781**<br>(0.0397) | -0.0920***<br>(0.0321) | -0.0831*<br>(0.0438) | -0.0431<br>(0.0270)   | -0.0279<br>(0.0239) |
| P-val (F-test of coefs=0 within category) |                      |                          | 0.00                 |                      | 0.00                   |                      | 0.23                  |                     |
| Mean (Below cutoff)                       | 0.16                 | 0.26                     | 0.48                 | 0.3                  | 0.22                   | 0.46                 | 0.89                  | 0.94                |
| N                                         | 2085                 | 2084                     | 2085                 | 2085                 | 2085                   | 1974                 | 2060                  | 2064                |
| <b>Panel C: Bandwidth -36 to 36</b>       |                      |                          |                      |                      |                        |                      |                       |                     |
| Above cutoff                              | 0.245***<br>(0.0328) | 0.0354<br>(0.0300)       | 0.106***<br>(0.0340) | 0.0577*<br>(0.0333)  | -0.0855***<br>(0.0266) | -0.0614*<br>(0.0366) | -0.0171<br>(0.0229)   | -0.0200<br>(0.0194) |
| P-val (F-test of coefs=0 within category) |                      |                          | 0.01                 |                      | 0.00                   |                      | 0.54                  |                     |
| Mean (Below cutoff)                       | 0.15                 | 0.27                     | 0.48                 | 0.31                 | 0.21                   | 0.45                 | 0.89                  | 0.93                |
| N                                         | 3056                 | 3054                     | 3056                 | 3056                 | 3056                   | 2896                 | 3019                  | 3025                |
| <b>Panel D: Optimal Bandwidth</b>         |                      |                          |                      |                      |                        |                      |                       |                     |
| Above cutoff                              | 0.205***<br>(0.0511) | 0.0679*<br>(0.0409)      | 0.120**<br>(0.0561)  | 0.0845*<br>(0.0434)  | -0.113***<br>(0.0411)  | -0.0836<br>(0.0510)  | -0.0744**<br>(0.0345) | -0.0279<br>(0.0240) |
| Mean (Below cutoff)                       | 0.18                 | 0.25                     | 0.45                 | 0.3                  | 0.22                   | 0.47                 | 0.89                  | 0.94                |
| Number of observations (total)            | 1399                 | 1605                     | 1263                 | 1751                 | 1399                   | 1513                 | 1381                  | 2064                |
| Bandwidth (-/+)                           | 14.2                 | 17.1                     | 12.2                 | 20.0                 | 14.5                   | 17.5                 | 14.0                  | 24.0                |
| Number of obs (left of the cutoff)        | 870                  | 957                      | 796                  | 1024                 | 870                    | 895                  | 856                   | 1172                |
| Number of obs (right of the cutoff)       | 638                  | 768                      | 565                  | 857                  | 638                    | 727                  | 630                   | 1041                |

\*\*\*p &lt; 0.01, \*\*p &lt; 0.05, \*p &lt; 0.1

*Note:* The table reports RD estimates corresponding to equation (1). Results for each outcome are reported in each column. All regressions include linear trends of the running variable on each side of the cutoff, as well as demographic controls, state fixed effects, and date-of-data-collection fixed effects. Demographic controls include the respondents' age, gender, civil status (single vs. married or cohabiting), and educational attainment (primary, secondary, college, graduate studies). We also control for household size and the number of school-age children in the household. Robust standard errors are reported in parentheses. Triangular kernels are used in all regressions. Panel A, B and C report results using bandwidths of 12, 24 and 36 months before and after the eligibility threshold (60 years old in March 2020). Panel D reports RD estimates using the bandwidth selection procedure of Calonico, Cattaneo and Farrell (2019).

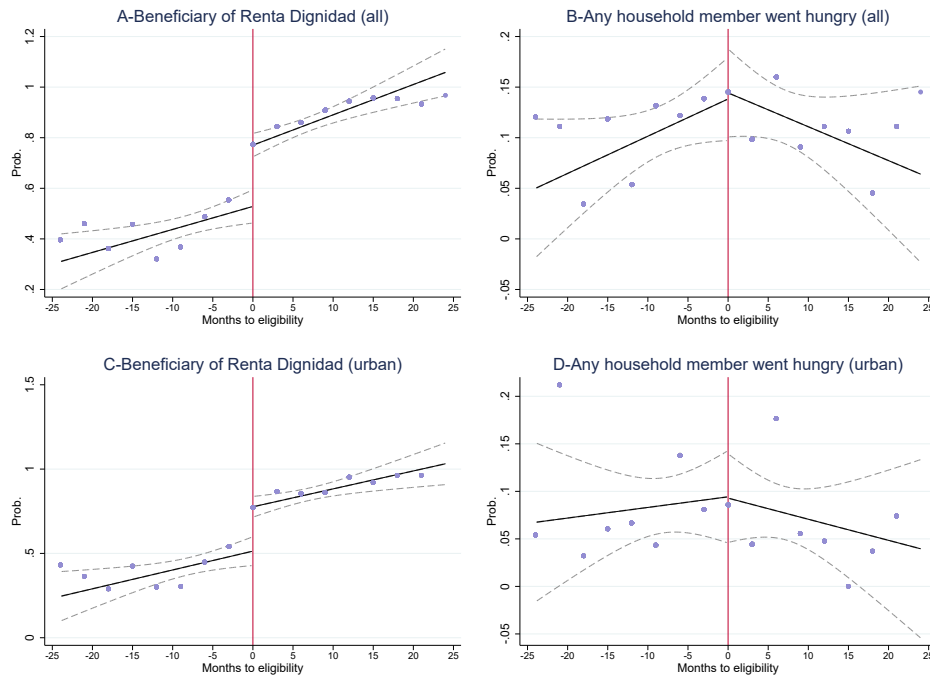

FIGURE 3. EFFECTS OF RENTA DIGNIDAD ON HUNGER BEFORE THE PANDEMIC

*Note:* The figure reports means corresponding to three-month bins around the cutoff determining program eligibility, and linear fits on each side of the cutoff using triangular kernels and a 24-month bandwidth. The sample includes observations of the 2016 to 2018 waves of the Bolivian Household Surveys conducted by the National Institute of Statistics (INE). The figures in the top panels depict results using all observations, while the figures in the bottom two panels depict results restricting the sample to urban households.

TABLE 4—RD EFFECTS ON HUNGER USING PRE-PANDEMIC DATA

|                     | -12 to 12                |                    | -24 to 24                |                    | -36 to 36                |                    |
|---------------------|--------------------------|--------------------|--------------------------|--------------------|--------------------------|--------------------|
|                     | Received Transfer<br>(1) | Went hungry<br>(2) | Received Transfer<br>(3) | Went hungry<br>(4) | Received Transfer<br>(5) | Went hungry<br>(6) |
| Above cutoff        | 0.208**<br>(0.0875)      | 0.0291<br>(0.0890) | 0.318***<br>(0.0645)     | 0.0446<br>(0.0622) | 0.364***<br>(0.0535)     | 0.0384<br>(0.0512) |
| Mean (Below cutoff) | 0.50                     | 0.13               | 0.45                     | 0.11               | 0.43                     | 0.10               |
| N                   | 295                      | 295                | 569                      | 569                | 839                      | 839                |

\*\*\* $p < 0.01$ , \*\* $p < 0.05$ , \* $p < 0.1$

*Note:* The table reports RD estimates corresponding to equation (1) using data from the 2016 to 2018 Household Survey waves conducted by INE. Results for each outcome are reported in each column. All Regressions include linear trends of the running variable on each side of the cutoff but do not include demographic controls. Triangular kernels are used in all regressions. Robust standard errors are presented in parentheses. *Went hungry* is coded as 1 if any household member went hungry and could not eat during the three months preceding the interview.

TABLE 5—HETEROGENEOUS EFFECTS BY EXPOSURE TO SHOCKS INDUCED BY THE PANDEMIC

| Panel A: Business closures during the pandemic               |                      |                      |                                        |                       |                              |                      |                       |                             |                     |
|--------------------------------------------------------------|----------------------|----------------------|----------------------------------------|-----------------------|------------------------------|----------------------|-----------------------|-----------------------------|---------------------|
| Business closure                                             | Received Transfer    | Can cover a shock    | Resilience<br>Enough resources (>week) | Enough food (>week)   | Food security<br>Went hungry | Eats less healthy    | Stressed (pandemic)   | Stress<br>Stressed (health) |                     |
| (1)                                                          | (2)                  | (3)                  | (4)                                    | (5)                   | (6)                          | (7)                  | (8)                   | (9)                         |                     |
| Business closure X Above cutoff                              | -0.0992*<br>(0.0568) | 0.0497<br>(0.0575)   | -0.112*<br>(0.0602)                    | -0.0388<br>(0.0614)   | -0.0977**<br>(0.0382)        | 0.121*<br>(0.0640)   | -0.00782<br>(0.0418)  | -0.0577*<br>(0.0310)        |                     |
| Above cutoff                                                 | -0.0133<br>(0.0459)  | 0.261***<br>(0.0610) | 0.0261<br>(0.0610)                     | 0.206***<br>(0.0623)  | 0.134**<br>(0.0640)          | -0.0335<br>(0.0379)  | -0.221***<br>(0.0671) | -0.0528<br>(0.0430)         | 0.0151<br>(0.0330)  |
| Business closure                                             |                      | 0.0381<br>(0.0336)   | -0.157***<br>(0.0388)                  | -0.0636<br>(0.0417)   | -0.0717*<br>(0.0415)         | 0.192***<br>(0.0266) | 0.00255<br>(0.0448)   | 0.0358<br>(0.0277)          | 0.0311<br>(0.0222)  |
| P-val (F-test of coefs=0 within category)                    |                      |                      | 0.05                                   |                       | 0.00                         |                      | 0.16                  |                             |                     |
| Mean (Below cutoff)                                          | 0.69                 | 0.16                 | 0.26                                   | 0.48                  | 0.30                         | 0.22                 | 0.46                  | 0.89                        | 0.94                |
| $\frac{Effect(shock=1)}{Avg.Effect} \times Share(shock = 1)$ |                      | 0.56                 | 0.86                                   | 0.49                  | 0.60                         | 0.89                 | 0.48                  | 0.71                        | 1.21                |
| N                                                            | 1455                 | 1455                 | 1454                                   | 1455                  | 1455                         | 1455                 | 1382                  | 1436                        | 1441                |
| Panel B: Job loss during the pandemic                        |                      |                      |                                        |                       |                              |                      |                       |                             |                     |
| Job loss                                                     | Received Transfer    | Can cover a shock    | Resilience<br>Enough resources (>week) | Enough food (>week)   | Food security<br>Went hungry | Eats less healthy    | Stressed (pandemic)   | Stress<br>Stressed (health) |                     |
| (1)                                                          | (2)                  | (3)                  | (4)                                    | (5)                   | (6)                          | (7)                  | (8)                   | (9)                         |                     |
| Job Loss X Above cutoff                                      |                      | 0.0782<br>(0.0501)   | 0.0673<br>(0.0459)                     | -0.0324<br>(0.0520)   | -0.0263<br>(0.0514)          | -0.0500<br>(0.0419)  | -0.0213<br>(0.0567)   | 0.00281<br>(0.0343)         | -0.0169<br>(0.0299) |
| Above cutoff                                                 | -0.0525<br>(0.0470)  | 0.213***<br>(0.0499) | 0.0531<br>(0.0489)                     | 0.158***<br>(0.0493)  | 0.0975*<br>(0.0515)          | -0.0560*<br>(0.0316) | -0.0908*<br>(0.0548)  | -0.0355<br>(0.0362)         | -0.0460<br>(0.0314) |
| Job Loss                                                     |                      | -0.0282<br>(0.0300)  | -0.225***<br>(0.0307)                  | -0.161***<br>(0.0353) | -0.0767**<br>(0.0345)        | 0.255***<br>(0.0299) | 0.119***<br>(0.0390)  | 0.0435*<br>(0.0233)         | 0.00191<br>(0.0188) |
| P-val (F-test of coefs=0 within category)                    |                      |                      | 0.19                                   |                       | 0.56                         |                      | 0.82                  |                             |                     |
| Mean (Below cutoff)                                          | 0.46                 | 0.16                 | 0.26                                   | 0.48                  | 0.30                         | 0.22                 | 0.46                  | 0.89                        | 0.94                |
| $\frac{Effect(shock=1)}{Avg.Effect} \times Share(shock = 1)$ |                      | 0.51                 | 0.63                                   | 0.37                  | 0.36                         | 0.59                 | 0.48                  | 0.41                        | 0.51                |
| N                                                            | 1670                 | 1670                 | 1669                                   | 1670                  | 1670                         | 1670                 | 1588                  | 1653                        | 1655                |

\*\*\*p < 0.01, \*\*p < 0.05, \*p < 0.1

*Note:* The table reports estimates corresponding to equation (2). Results for each outcome are reported in each column. All regressions include linear trends of the running variable on each side of the cutoff, as well as demographic controls, state fixed effects, and date-of-data-collection fixed effects. Demographic controls include the respondents' age, gender, civil status (single vs. married or cohabiting), and educational attainment (primary, secondary, college, graduate studies). We also control for household size and the number of school-age children in the household. All regressions are estimated using a bandwidth of 24 months before and after the eligibility threshold (60 years old in March 2020) and triangular kernels. Robust standard errors are reported in parentheses. Panel A reports results using business closures during the pandemic as a measure of shocks. Observations of households without businesses before the pandemic are coded as missing. Panel B reports results using job losses as a measure of shocks. Observations of households that, before the pandemic, did not obtain income from paid work are coded as missing.

TABLE 6—HETEROGENEITY BY PRE-PANDEMIC INCOME

| <b>Panel A: Low income</b>                |                          |                          |                                 |                            |                      |                          |                            |                          |
|-------------------------------------------|--------------------------|--------------------------|---------------------------------|----------------------------|----------------------|--------------------------|----------------------------|--------------------------|
|                                           | Received transfer<br>(1) | Can cover a shock<br>(2) | Enough resources (>week)<br>(3) | Enough food (>week)<br>(4) | Went hungry<br>(5)   | Eats less healthy<br>(6) | Stressed (pandemic)<br>(7) | Stressed (health)<br>(8) |
| Above cutoff                              | 0.240***<br>(0.0619)     | 0.0274<br>(0.0433)       | 0.208***<br>(0.0602)            | 0.0832<br>(0.0571)         | -0.128**<br>(0.0611) | -0.107<br>(0.0711)       | -0.0234<br>(0.0402)        | -0.0426<br>(0.0395)      |
| P-val (F-test of coefs=0 within category) |                          |                          | 0.00                            |                            | 0.06                 |                          |                            | 0.53                     |
| Mean (Below cutoff)                       | 0.17                     | 0.10                     | 0.27                            | 0.20                       | 0.36                 | 0.54                     | 0.92                       | 0.94                     |
| N                                         | 828                      | 827                      | 828                             | 828                        | 828                  | 761                      | 812                        | 813                      |
| <b>Panel B: Middle income</b>             |                          |                          |                                 |                            |                      |                          |                            |                          |
| Above cutoff                              | 0.209***<br>(0.0590)     | 0.0602<br>(0.0560)       | 0.0650<br>(0.0600)              | 0.0492<br>(0.0589)         | -0.0356<br>(0.0385)  | -0.0926<br>(0.0650)      | -0.0264<br>(0.0423)        | -0.0225<br>(0.0337)      |
| P-val (F-test of coefs=0 within category) |                          |                          | 0.37                            |                            | 0.35                 |                          |                            | 0.73                     |
| P-value (diff with low income)            | 0.71                     | 0.63                     | 0.08                            | 0.67                       | 0.19                 | 0.88                     | 0.96                       | 0.69                     |
| Mean (Below cutoff)                       | 0.16                     | 0.30                     | 0.57                            | 0.34                       | 0.13                 | 0.41                     | 0.87                       | 0.95                     |
| N                                         | 964                      | 964                      | 964                             | 964                        | 964                  | 926                      | 958                        | 961                      |
| <b>Panel C: High income</b>               |                          |                          |                                 |                            |                      |                          |                            |                          |
| Above cutoff                              | 0.119<br>(0.112)         | 0.125<br>(0.119)         | -0.0509<br>(0.0936)             | 0.147<br>(0.117)           | -0.0355<br>(0.0504)  | 0.118<br>(0.124)         | 0.0330<br>(0.0871)         | 0.0578<br>(0.0762)       |
| P-val (F-test of coefs=0 within category) |                          |                          | 0.23                            |                            | 0.35                 |                          |                            | 0.70                     |
| P-value (diff with low income)            | 0.29                     | 0.38                     | 0.01                            | 0.58                       | 0.21                 | 0.08                     | 0.51                       | 0.19                     |
| Mean (Below cutoff)                       | 0.14                     | 0.84                     | 0.51                            | 0.05                       | 0.41                 | 0.83                     | 0.89                       | 0.16                     |
| N                                         | 283                      | 283                      | 283                             | 283                        | 283                  | 278                      | 281                        | 281                      |

\*\*\* $p < 0.01$ , \*\* $p < 0.05$ , \* $p < 0.1$ 

*Note:* The table reports RD estimates corresponding to equation (1) using a bandwidth of 24 months before and after the age eligibility cutoff (March 2020) and triangular kernels. All regressions include linear trends of the running variable on each side of the cutoff, as well as demographic controls, state fixed effects, and date-of-data-collection fixed effects. Demographic controls include the respondents' age, gender, civil status (single vs. married or cohabiting), and educational attainment (primary, secondary, college, graduate studies). We also control for household size and the number of school-age children in the household. Robust standard errors are reported in parentheses. Panels A, B, and C report results for the subsample of households with total January 2020 income below the national monthly minimum wage (<\$ USD 300), between one and 4 times the national monthly minimum wage (\$ USD 300 to \$ USD 1,200), and over 4 times the national monthly minimum wage (> \$ 1,200), respectively.



SUPPLEMENTARY FIGURES AND TABLES

TABLE A1—COMPARATIVE STATISTICS FOR ONLINE AND HOUSEHOLD SURVEY DATA - HOUSEHOLDS WITH ELDERLY MEMBERS

|                                                                                        | All households |              |                    | 24 month bandwidth |              |                    |
|----------------------------------------------------------------------------------------|----------------|--------------|--------------------|--------------------|--------------|--------------------|
|                                                                                        | (1)<br>Online  | (2)<br>Field | (3)<br>Field Urban | (4)<br>Online      | (5)<br>Field | (6)<br>Field Urban |
| <i>Panel A - Household characteristics</i>                                             |                |              |                    |                    |              |                    |
| Household size                                                                         | 4.93           | 3.47         | 3.69               | 5.47               | 3.70         | 3.87               |
| Children under 5 years old in household (%)                                            | 0.37           | 0.11         | 0.11               | 0.37               | 0.15         | 0.14               |
| # of children enrolled in school                                                       | 1.96           | 0.51         | 0.52               | 2.00               | 0.59         | 0.61               |
| <i>Panel B - Household pre-pandemic income (relative to the national minimum wage)</i> |                |              |                    |                    |              |                    |
| 0-0.5 MW                                                                               | 0.17           | 0.17         | 0.03               | 0.16               | 0.14         | 0.02               |
| 0.5-1 MW                                                                               | 0.23           | 0.12         | 0.06               | 0.24               | 0.09         | 0.05               |
| 1-2 MW                                                                                 | 0.25           | 0.20         | 0.20               | 0.25               | 0.21         | 0.21               |
| 2-3 MW                                                                                 | 0.12           | 0.16         | 0.20               | 0.13               | 0.18         | 0.21               |
| 3-4 MW                                                                                 | 0.08           | 0.12         | 0.16               | 0.08               | 0.13         | 0.16               |
| 4-6 MW                                                                                 | 0.06           | 0.13         | 0.20               | 0.06               | 0.14         | 0.19               |
| 6-8 MW                                                                                 | 0.03           | 0.06         | 0.09               | 0.03               | 0.07         | 0.10               |
| 8-11 MW                                                                                | 0.02           | 0.03         | 0.04               | 0.02               | 0.03         | 0.05               |
| 11+ MW                                                                                 | 0.02           | 0.01         | 0.02               | 0.02               | 0.01         | 0.01               |
| <i>Panel C - Individual characteristics</i>                                            |                |              |                    |                    |              |                    |
| Female                                                                                 | 0.62           | 0.52         | 0.53               | 0.63               | 0.51         | 0.52               |
| No education                                                                           | 0.00           | 0.14         | 0.06               | 0.00               | 0.08         | 0.04               |
| Completed primary                                                                      | 0.01           | 0.33         | 0.25               | 0.01               | 0.31         | 0.23               |
| Completed secondary                                                                    | 0.15           | 0.28         | 0.32               | 0.14               | 0.33         | 0.35               |
| College or vocational training                                                         | 0.84           | 0.25         | 0.36               | 0.85               | 0.28         | 0.38               |
| Age                                                                                    | 34.56          | 53.87        | 51.24              | 34.36              | 47.03        | 45.20              |

*Note:* The table reports averages of households and individual characteristics corresponding to households of which the oldest household member is at least 55 years old (Columns 1 to 3), and to households whose oldest member age is within 24 months on each side of the eligibility cutoff (Columns 4 to 6). Columns 1 and 4 report raw means using data collected online during the pandemic. Columns 2,3,5 and 6 report means using data from the 2018 wave of the Bolivian household survey collected through field visits by INE (National Institute of Statistics). Columns 3 and 6 report means focusing only on field survey observations from households in urban areas. Variables in Panel C refer to characteristics of the respondent in the case of the online data, and to characteristics of all household members in case of the household survey data. Survey weights were used to compute means in the case of the 2018 household survey.

TABLE A2—MANIPULATION TEST

| Method       | T     | $P >  T $ |
|--------------|-------|-----------|
| Conventional | -1.48 | 0.14      |
| Robust       | 0.60  | 0.55      |

*Note:* The table reports results from the Manipulation test proposed by Cattaneo, Jansson and Ma (2019) estimated using local quadratic approximations using optimally selected bandwidths of 11 and 13 months to the left and right of the cutoff.

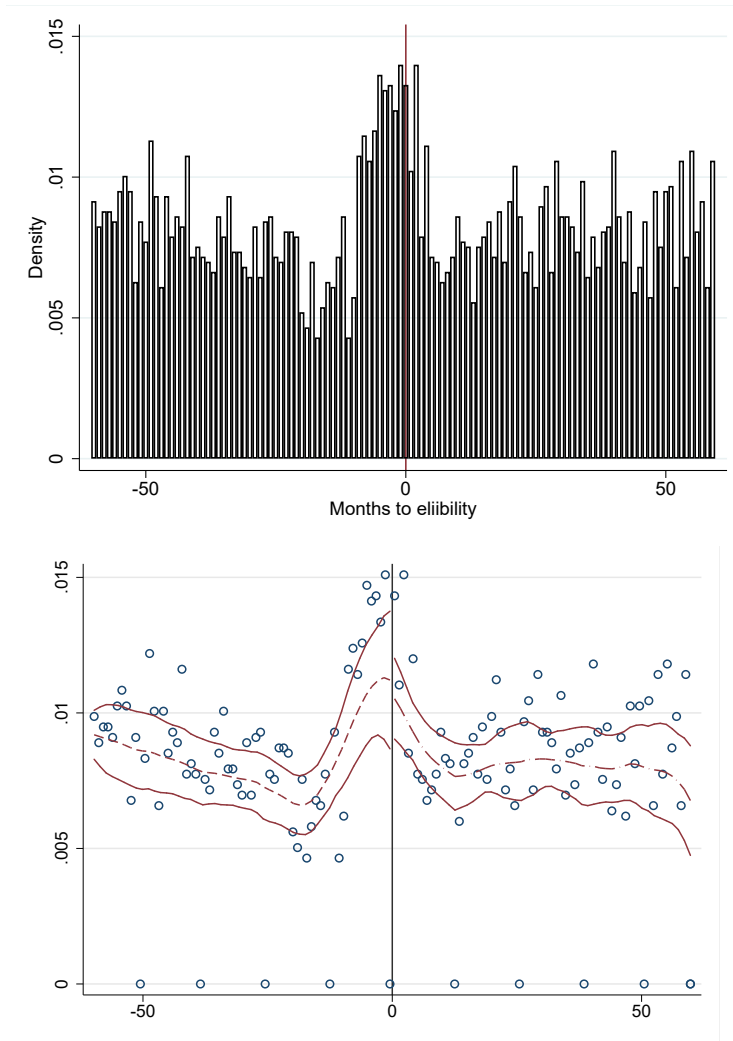

FIGURE A1. DISTRIBUTION OF AGE TO ELIGIBILITY (RUNNING VARIABLE)

*Note:* The figures reports the histogram corresponding to the month of birth of the oldest person in the respondents' household normalized with respect to March 2020, the month preceding data collection, and the (McCrary, 2008) test for differences in densities around the cutoff. Negative numbers denote ineligible households while positive numbers denote eligible households.

TABLE A3—BALANCE OF COVARIATES AROUND THE CUTOFF

|                                                        |                      |                      | Bandwidth           |         |                     |         |                     |         |
|--------------------------------------------------------|----------------------|----------------------|---------------------|---------|---------------------|---------|---------------------|---------|
|                                                        | Mean<br>Below cutoff | Mean<br>Above cutoff | 12<br>RD Difference | P-value | 24<br>RD Difference | P-value | 36<br>RD Difference | P-value |
| <i>Respondent's Characteristics</i>                    |                      |                      |                     |         |                     |         |                     |         |
| Gender (female)                                        | 0.62                 | 0.62                 | -0.071              | 0.202   | -0.029              | 0.472   | -0.021              | 0.522   |
| Age                                                    | 33.56                | 36.95                | 0.869               | 0.511   | 1.533               | 0.109   | 0.726               | 0.364   |
| Marital/Civil status                                   | 0.37                 | 0.37                 | -0.079              | 0.160   | -0.060              | 0.141   | -0.061*             | 0.071   |
| <i>Education (Respondent)</i>                          |                      |                      |                     |         |                     |         |                     |         |
| None                                                   | 0.00                 | 0.00                 | -0.001              | 0.599   | -0.003              | 0.159   | -0.003              | 0.144   |
| Primary                                                | 0.01                 | 0.00                 | 0.023               | 0.123   | 0.012               | 0.229   | 0.008               | 0.309   |
| Secondary                                              | 0.16                 | 0.12                 | 0.067*              | 0.091   | 0.022               | 0.441   | 0.019               | 0.425   |
| Technical/Vocational                                   | 0.22                 | 0.19                 | -0.050              | 0.271   | -0.046              | 0.158   | -0.048*             | 0.083   |
| University                                             | 0.49                 | 0.51                 | -0.035              | 0.542   | -0.007              | 0.872   | 0.007               | 0.846   |
| Graduate degree                                        | 0.12                 | 0.17                 | -0.003              | 0.927   | 0.022               | 0.416   | 0.017               | 0.455   |
| <i>Household characteristics</i>                       |                      |                      |                     |         |                     |         |                     |         |
| Number of household members                            | 5.51                 | 5.52                 | -0.026              | 0.939   | 0.173               | 0.479   | 0.145               | 0.478   |
| Number of children                                     | 0.97                 | 1.01                 | 0.167               | 0.226   | 0.094               | 0.350   | 0.064               | 0.448   |
| Days since last day of data collection (wrt 4/30/2020) | 10.38                | 10.14                | 0.503               | 0.491   | 0.714               | 0.180   | 0.746*              | 0.097   |
| P-val (All coefficients=0)                             |                      |                      |                     | 0.20    |                     | 0.11    |                     | 0.12    |

*Note:* The table reports means of demographic characteristics for households whose oldest member was between 55-60 years old at the time of data collection (Below cutoff), and for households whose oldest member was between 60-65 years old (Above cutoff). The table also report RD estimates corresponding to equation (1) using each covariate as a dependent variable for different bandwidths. RD regressions use triangular kernels.

TABLE A4—CORRELATES OF PROGRAM COMPLIANCE AND HOUSEHOLD CHARACTERISTICS

|                                                  | OLS<br>(1)             | All<br>OLS (Lasso selection)<br>(2) | OLS<br>(3)             | Eligible<br>OLS (Lasso selection)<br>(4) | OLS<br>(5)              | Ineligible<br>OLS (Lasso selection)<br>(6) |
|--------------------------------------------------|------------------------|-------------------------------------|------------------------|------------------------------------------|-------------------------|--------------------------------------------|
| <i>Respondent's Characteristics</i>              |                        |                                     |                        |                                          |                         |                                            |
| Female                                           | -0.0523***<br>(0.0148) | -0.0519***<br>(0.0146)              | -0.0341<br>(0.0215)    | -0.0348<br>(0.0215)                      | -0.0708***<br>(0.0147)  | -0.0709***<br>(0.0144)                     |
| Age                                              | 0.00107<br>(0.000661)  | 0.00132**<br>(0.000642)             | 0.00101<br>(0.000943)  | 0.00101<br>(0.000929)                    | -0.000886<br>(0.000589) | -0.000924<br>(0.000577)                    |
| <i>Respondent's education</i>                    |                        |                                     |                        |                                          |                         |                                            |
| Secondary                                        | 0.0526<br>(0.0935)     |                                     | 0.101<br>(0.154)       |                                          | -0.0684<br>(0.105)      |                                            |
| Technical/Vocational                             | 0.0561<br>(0.0929)     |                                     | 0.123<br>(0.153)       | 0.0206<br>(0.0264)                       | -0.0765<br>(0.104)      |                                            |
| University                                       | 0.0594<br>(0.0922)     |                                     | 0.104<br>(0.152)       |                                          | -0.0630<br>(0.104)      | 0.00966<br>(0.0145)                        |
| Graduate degree                                  | 0.00926<br>(0.0936)    | -0.0484**<br>(0.0206)               | 0.0273<br>(0.154)      | -0.0752**<br>(0.0314)                    | -0.0949<br>(0.104)      | -0.0162<br>(0.0204)                        |
| <i>Household characteristics</i>                 |                        |                                     |                        |                                          |                         |                                            |
| Number of adults                                 | 0.0104***<br>(0.00339) | 0.0103***<br>(0.00337)              | 0.00847*<br>(0.00492)  | 0.00847*<br>(0.00491)                    | 0.00889**<br>(0.00359)  | 0.00790**<br>(0.00333)                     |
| Number of children (<18 years old)               | 0.00628<br>(0.00637)   | 0.00494<br>(0.00627)                | -0.00824<br>(0.00934)  | -0.00869<br>(0.00931)                    | 0.0137**<br>(0.00658)   | 0.0126**<br>(0.00624)                      |
| Any child 6 years old or younger                 | -0.0356**<br>(0.0162)  | -0.0340**<br>(0.0161)               | -0.0726***<br>(0.0241) | -0.0727***<br>(0.0241)                   | -0.00169<br>(0.0155)    |                                            |
| <i>Agreement with social distancing measures</i> |                        |                                     |                        |                                          |                         |                                            |
| Going out to work                                | -0.0211<br>(0.0312)    | -0.0209<br>(0.0303)                 | -0.0190<br>(0.0482)    | -0.0181<br>(0.0482)                      | -0.0124<br>(0.0283)     |                                            |
| Going out to medical facilities                  | 0.000150<br>(0.0156)   |                                     | 0.0275<br>(0.0232)     | 0.0271<br>(0.0232)                       | -0.0130<br>(0.0150)     | -0.0149<br>(0.0147)                        |
| Going out to the market/grocery store            | -0.00101<br>(0.0168)   |                                     | 0.0121<br>(0.0249)     | 0.0119<br>(0.0248)                       | -0.0192<br>(0.0153)     | -0.0182<br>(0.0151)                        |
| Going out to the bank                            | 0.0885***<br>(0.0315)  | 0.0886***<br>(0.0301)               | 0.0725*<br>(0.0428)    | 0.0731*<br>(0.0427)                      | 0.0516<br>(0.0321)      | 0.0510<br>(0.0314)                         |
| Visit friends                                    | -0.0863<br>(0.0755)    | -0.0967<br>(0.0731)                 | -0.0505<br>(0.126)     | -0.0548<br>(0.124)                       | -0.0918<br>(0.0667)     | -0.0693<br>(0.0469)                        |
| Visit relatives                                  | -0.0796<br>(0.0564)    | -0.0855<br>(0.0556)                 | -0.130<br>(0.0976)     | -0.133<br>(0.0973)                       | 0.0197<br>(0.0560)      |                                            |
| Exercising outside                               | -0.0146<br>(0.0271)    |                                     | -0.0491<br>(0.0400)    | -0.0492<br>(0.0399)                      | 0.000459<br>(0.0271)    |                                            |
| Going to church                                  | -0.0142<br>(0.0514)    |                                     | -0.0500<br>(0.0742)    | -0.0489<br>(0.0739)                      | 0.0402<br>(0.0532)      |                                            |
| Mean DV                                          |                        | 0.34                                |                        | 0.58                                     |                         | 0.11                                       |
| N                                                | 4770                   | 4829                                | 2362                   | 2362                                     | 2408                    | 2462                                       |
| R-sq                                             | 0.018                  | 0.018                               | 0.028                  | 0.028                                    | 0.039                   | 0.037                                      |

\*\*\* $p < 0.01$ , \*\* $p < 0.05$ , \* $p < 0.1$

*Note:* The table reports OLS estimates of the probability of receiving Renta Dignidad on household characteristics for the subsample of eligible households (above the cut-off). Odd-numbered columns report OLS coefficients using a battery of demographic characteristics and perceptions about the importance of practicing social distancing. Even-numbered columns report OLS coefficients of regressions only including variables that were selected using the LASSO with penalty parameter selected through 10-fold cross validation. Perceptions about social-distancing measures during the pandemic are coded as dummy variables that take the value of 1 if the survey respondent reported agreeing with the idea that going out during the pandemic was justified for each of the following specific motives: going out to work, visiting medical facilities, going to grocery stores, visiting bank branches, visiting friends, relatives, exercising outside and going to church. All regressions control for region and date-of-interview fixed effects. Robust standard errors are presented in parentheses.

TABLE A5—ROBUSTNESS TO EXCLUDING COVARIATES

|                                     | Received Transfer<br>(1) | Can cover a shock<br>(2) | Enough resources (>week)<br>(3) | Enough food (>week)<br>(4) | Went hungry<br>(5)     | Eats less healthy<br>(6) | Stressed (pandemic)<br>(7) | Stressed (health)<br>(8) | Resilience<br>(9)    | Food security<br>(10) | Stress<br>(11)        |
|-------------------------------------|--------------------------|--------------------------|---------------------------------|----------------------------|------------------------|--------------------------|----------------------------|--------------------------|----------------------|-----------------------|-----------------------|
| <b>Panel A: Bandwidth -12 to 12</b> |                          |                          |                                 |                            |                        |                          |                            |                          |                      |                       |                       |
| Above cutoff                        | 0.240***<br>(0.0535)     | 0.0619<br>(0.0493)       | 0.0771<br>(0.0574)              | 0.0983*<br>(0.0543)        | -0.111**<br>(0.0437)   | -0.0466<br>(0.0583)      | -0.0753**<br>(0.0382)      | -0.0527<br>(0.0333)      | 0.0697<br>(0.0438)   | 0.0874**<br>(0.0341)  | -0.0642**<br>(0.0302) |
| Mean (Below cutoff)                 | 0.19                     | 0.24                     | 0.45                            | 0.29                       | 0.22                   | 0.47                     | 0.90                       | 0.94                     | 0.35                 | 0.53                  | 0.92                  |
| N                                   | 1271                     | 1269                     | 1271                            | 1271                       | 1271                   | 1189                     | 1251                       | 1256                     | 1271                 | 1271                  | 1257                  |
| <b>Panel B: Bandwidth -24 to 24</b> |                          |                          |                                 |                            |                        |                          |                            |                          |                      |                       |                       |
| Above cutoff                        | 0.245***<br>(0.0383)     | 0.0618*<br>(0.0363)      | 0.105**<br>(0.0415)             | 0.0747*<br>(0.0390)        | -0.0890***<br>(0.0320) | -0.0766*<br>(0.0423)     | -0.0390<br>(0.0271)        | -0.0383*<br>(0.0231)     | 0.0825**<br>(0.0321) | 0.0795***<br>(0.0250) | -0.0386*<br>(0.0208)  |
| Mean (Below cutoff)                 | 0.16                     | 0.26                     | 0.48                            | 0.30                       | 0.22                   | 0.46                     | 0.89                       | 0.94                     | 0.37                 | 0.54                  | 0.91                  |
| N                                   | 2238                     | 2235                     | 2238                            | 2238                       | 2238                   | 2112                     | 2208                       | 2213                     | 2238                 | 2238                  | 2217                  |
| <b>Panel C: Bandwidth -36 to 36</b> |                          |                          |                                 |                            |                        |                          |                            |                          |                      |                       |                       |
| Above cutoff                        | 0.268***<br>(0.0318)     | 0.0418<br>(0.0306)       | 0.0853**<br>(0.0347)            | 0.0554*<br>(0.0326)        | -0.0831***<br>(0.0267) | -0.0614*<br>(0.0355)     | -0.0174<br>(0.0227)        | -0.0287<br>(0.0189)      | 0.0627**<br>(0.0270) | 0.0664***<br>(0.0210) | -0.0229<br>(0.0170)   |
| Mean (Below cutoff)                 | 0.15                     | 0.27                     | 0.48                            | 0.31                       | 0.21                   | 0.45                     | 0.89                       | 0.93                     | 0.38                 | 0.55                  | 0.91                  |
| N                                   | 3295                     | 3291                     | 3295                            | 3295                       | 3295                   | 3109                     | 3250                       | 3258                     | 3295                 | 3295                  | 3266                  |

\*\*\* $p < 0.01$ , \*\* $p < 0.05$ , \* $p < 0.1$ 

*Note:* The table reports RD estimates corresponding to equation (1). Results for each outcome are reported in each column. Columns 9 to 11 include results for three index variables. Resilience includes the probability of being able to cover an unexpected financial shock and the probability of having enough resources to cover a week's worth of expenses. Food security includes the probability that a household has enough food in stock to cover a week's worth of meals, the probability that no household member experienced hunger, and the probability that the household does not report eating less healthy (such that higher values imply higher food security). Stress includes indicators of whether the respondent feels stressed due to the pandemic and due to the health of her/his family members. All regressions include linear trends of the running variable on each side of the cutoff but do not include demographic controls. Panel A uses a bandwidth of 12 months before and after the cutoff, while panels B and C use 24- and 36-month bandwidths. Triangular kernels are used in all regressions. Robust standard errors are presented in parentheses.

TABLE A6—ROBUSTNESS TO HIGHER ORDER POLYNOMIALS

| <b>Panel A: Bandwidth -12 to 12</b> |                          |                          |                                 |                            |                       |                          |                            |                          |                      |                       |                       |
|-------------------------------------|--------------------------|--------------------------|---------------------------------|----------------------------|-----------------------|--------------------------|----------------------------|--------------------------|----------------------|-----------------------|-----------------------|
|                                     | Received Transfer<br>(1) | Can cover a shock<br>(2) | Enough resources (>week)<br>(3) | Enough food (>week)<br>(4) | Went hungry<br>(5)    | Eats less healthy<br>(6) | Stressed (pandemic)<br>(7) | Stressed (health)<br>(8) | Resilience<br>(9)    | Food security<br>(10) | Stress<br>(11)        |
| Above cutoff                        | 0.133<br>(0.0910)        | 0.0180<br>(0.0730)       | 0.182**<br>(0.0910)             | 0.119<br>(0.0880)          | -0.163**<br>(0.0669)  | -0.0917<br>(0.0955)      | -0.0945<br>(0.0592)        | -0.0618<br>(0.0545)      | 0.0999<br>(0.0673)   | 0.126**<br>(0.0522)   | -0.0781<br>(0.0488)   |
| Mean (Below cutoff)                 | 0.19                     | 0.24                     | 0.45                            | 0.29                       | 0.22                  | 0.47                     | 0.90                       | 0.94                     | 0.35                 | 0.53                  | 0.92                  |
| N                                   | 1183                     | 1183                     | 1183                            | 1183                       | 1183                  | 1110                     | 1167                       | 1171                     | 1183                 | 1183                  | 1172                  |
| <b>Panel B: Bandwidth -24 to 24</b> |                          |                          |                                 |                            |                       |                          |                            |                          |                      |                       |                       |
| Above cutoff                        | 0.187***<br>(0.0576)     | 0.0686<br>(0.0502)       | 0.111*<br>(0.0590)              | 0.101*<br>(0.0575)         | -0.118**<br>(0.0463)  | -0.0828<br>(0.0635)      | -0.0821**<br>(0.0389)      | -0.0494<br>(0.0352)      | 0.0895**<br>(0.0444) | 0.102***<br>(0.0360)  | -0.0660**<br>(0.0313) |
| Mean (Below cutoff)                 | 0.16                     | 0.26                     | 0.48                            | 0.30                       | 0.22                  | 0.46                     | 0.89                       | 0.94                     | 0.37                 | 0.54                  | 0.91                  |
| N                                   | 2085                     | 2084                     | 2085                            | 2085                       | 2085                  | 1974                     | 2060                       | 2064                     | 2085                 | 2085                  | 2067                  |
| <b>Panel C: Bandwidth -36 to 36</b> |                          |                          |                                 |                            |                       |                          |                            |                          |                      |                       |                       |
| Above cutoff                        | 0.185***<br>(0.0465)     | 0.0684<br>(0.0417)       | 0.135***<br>(0.0479)            | 0.0877*<br>(0.0467)        | -0.105***<br>(0.0380) | -0.103**<br>(0.0517)     | -0.0541*<br>(0.0321)       | -0.0363<br>(0.0286)      | 0.102***<br>(0.0363) | 0.0971***<br>(0.0294) | -0.0454*<br>(0.0254)  |
| Mean (Below cutoff)                 | 0.15                     | 0.27                     | 0.48                            | 0.31                       | 0.21                  | 0.45                     | 0.89                       | 0.93                     | 0.38                 | 0.55                  | 0.91                  |
| N                                   | 3056                     | 3054                     | 3056                            | 3056                       | 3056                  | 2896                     | 3019                       | 3025                     | 3056                 | 3056                  | 3031                  |

\*\*\* $p < 0.01$ , \*\* $p < 0.05$ , \* $p < 0.1$

*Note:* The table reports RD estimates corresponding to equation (1). Results for each outcome are reported in each column. Columns 9 to 11 include results for three index variables. Resilience includes the probability of being able to cover an unexpected financial shock and the probability of having enough resources to cover a week's worth of expenses. Food security includes the probability that a household has enough food in stock to cover a week's worth of meals, the probability that no household member experienced hunger, and the probability that the household does not report eating less healthily (such that higher values imply higher food security). Stress includes indicators of whether the respondent feels stressed due to the pandemic and due to the health of her/his family members. All regressions include linear and quadratic trends of the running variable on each side of the cutoff as well as demographic controls, state fixed effects, and date-of-data-collection fixed effects. Robust standard errors are reported in parentheses. Panel A uses a bandwidth of 12 months before and after the cutoff, while panels B and C use 24- and 36-month bandwidths. Triangular kernels are used in all regressions.

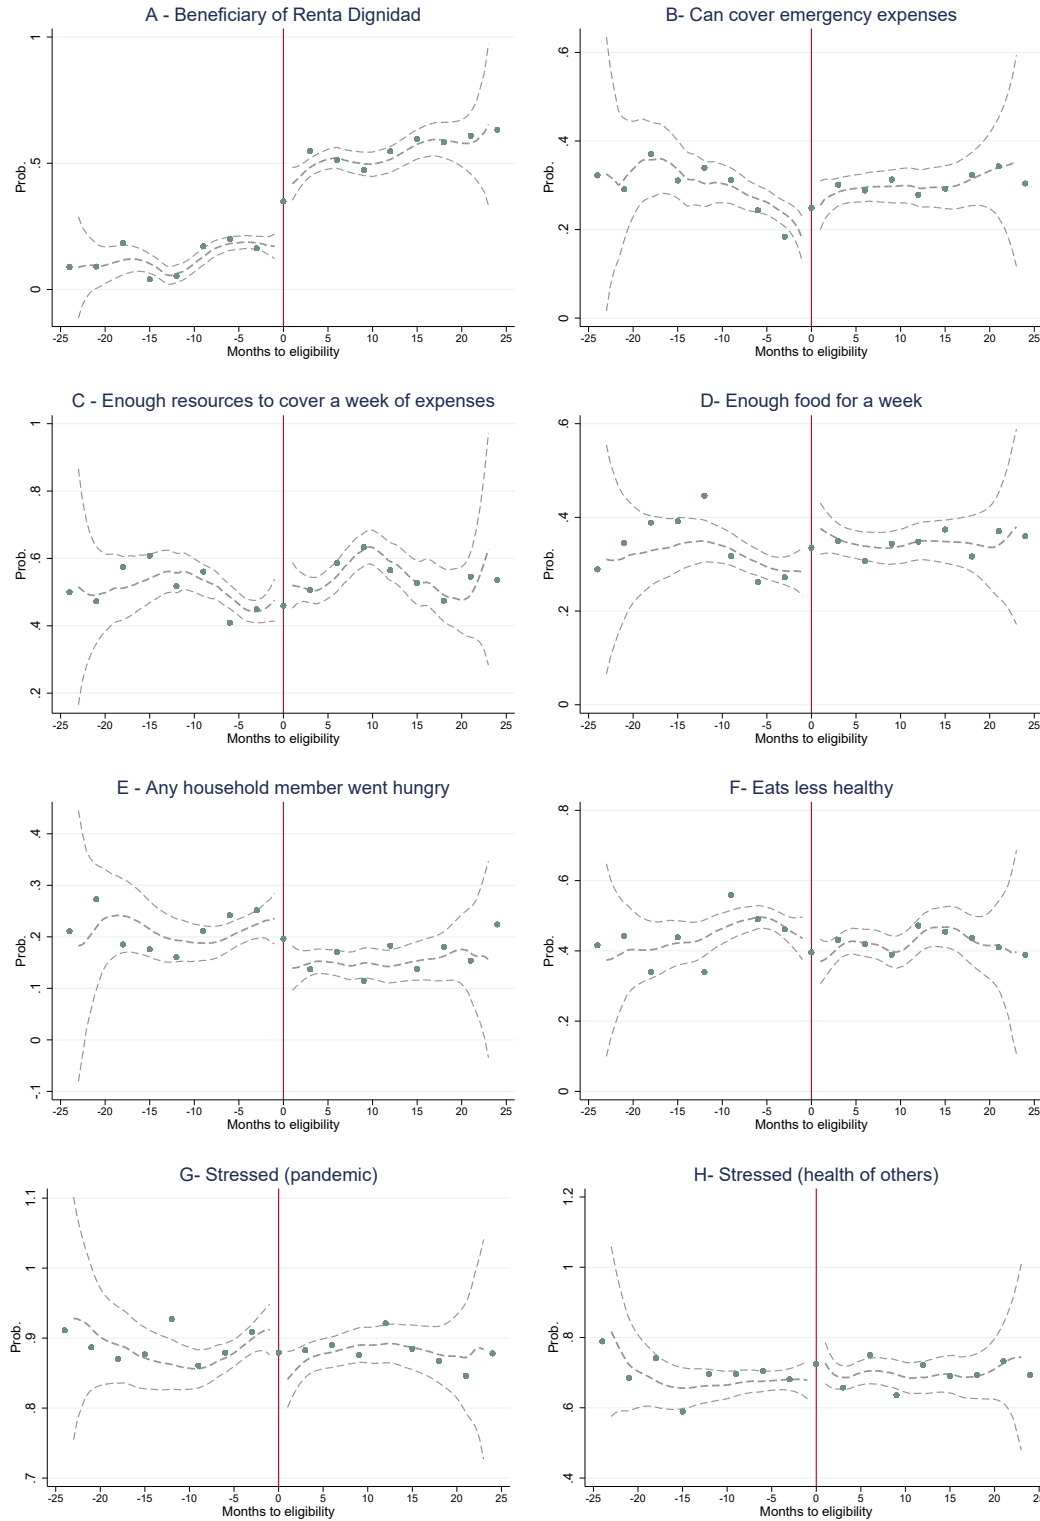

FIGURE A2. DISCONTINUITIES AT THE CUTOFF FOR MAIN OUTCOMES (NON-PARAMETRIC ESTIMATES)

*Note:* The figure reports means corresponding to three-month bins around the cutoff determining program eligibility, and local linear regression estimates using triangular weights over a bandwidth of 24 months on each side of the cutoff. Dashed lines report 90% confidence intervals.



TABLE A7—ROBUSTNESS TO PLACEBO CUTOFF DATES

| <b>Panel A: Cutoff in -24</b> |                          |                          |                                 |                            |                     |                          |                            |                          |                    |                       |                      |
|-------------------------------|--------------------------|--------------------------|---------------------------------|----------------------------|---------------------|--------------------------|----------------------------|--------------------------|--------------------|-----------------------|----------------------|
|                               | Received Transfer<br>(1) | Can cover a shock<br>(2) | Enough resources (>week)<br>(3) | Enough food (>week)<br>(4) | Went hungry<br>(5)  | Eats less healthy<br>(6) | Stressed (pandemic)<br>(7) | Stressed (health)<br>(8) | Resilience<br>(9)  | Food security<br>(10) | Stress<br>(11)       |
| Above cutoff                  | -0.0336<br>(0.0471)      | 0.0218<br>(0.0437)       | 0.0174<br>(0.0451)              | -0.00431<br>(0.0457)       | -0.0350<br>(0.0360) | -0.0552<br>(0.0488)      | 0.00563<br>(0.0334)        | -0.0199<br>(0.0226)      | 0.0185<br>(0.0364) | 0.0257<br>(0.0286)    | -0.00727<br>(0.0212) |
| Mean (Below cutoff)           | 0.57                     | 0.31                     | 0.53                            | 0.35                       | 0.17                | 0.43                     | 0.87                       | 0.95                     | 0.42               | 0.58                  | 0.91                 |
| N                             | 1988                     | 1985                     | 1988                            | 1988                       | 1988                | 1879                     | 1963                       | 1966                     | 1988               | 1988                  | 1968                 |
| <b>Panel B: Cutoff in +24</b> |                          |                          |                                 |                            |                     |                          |                            |                          |                    |                       |                      |
| Above cutoff                  | -0.0131<br>(0.0283)      | 0.0431<br>(0.0452)       | 0.0215<br>(0.0486)              | 0.00915<br>(0.0445)        | 0.0523<br>(0.0383)  | -0.0523<br>(0.0503)      | 0.0226<br>(0.0309)         | 0.0116<br>(0.0275)       | 0.0324<br>(0.0389) | 0.00393<br>(0.0294)   | 0.0173<br>(0.0220)   |
| Mean (Below cutoff)           | 0.09                     | 0.28                     | 0.49                            | 0.31                       | 0.19                | 0.41                     | 0.86                       | 0.91                     | 0.38               | 0.57                  | 0.89                 |
| N                             | 1974                     | 1972                     | 1974                            | 1974                       | 1974                | 1870                     | 1952                       | 1953                     | 1974               | 1974                  | 1960                 |

\*\*\* $p < 0.01$ , \*\* $p < 0.05$ , \* $p < 0.1$

*Note:* The table reports RD estimates corresponding to equation (1) using two placebo cutoffs. Panel A reports results using March 2018 as a placebo cutoff (24 months before the actual age eligibility cutoff). Panel B reports results using March 2022 as a placebo cutoff (24 months after the actual age eligibility cutoff). Results for each outcome are reported in each column. Columns 9 to 11 include results for three index variables. Resilience includes the probability of being able to cover an unexpected financial shock and the probability of having enough resources to cover a week’s worth of expenses. Food security includes the probability that a household has enough food in stock to cover a week’s worth of meals, the probability that no household member experienced hunger, and the probability that the household does not report eating less healthy (such that higher values imply higher food security). Stress includes indicators of whether the respondent feels stressed due to the pandemic and due to the health of her/his family members. All regressions include linear trends of the running variable on each side of the cutoff as well as demographic controls, state fixed effects, and date-of-data-collection fixed effects. Robust standard errors are reported in parentheses. Regressions are estimated over a bandwidth of 24 months before and after the placebo cutoffs. Triangular kernels are used in all regressions.

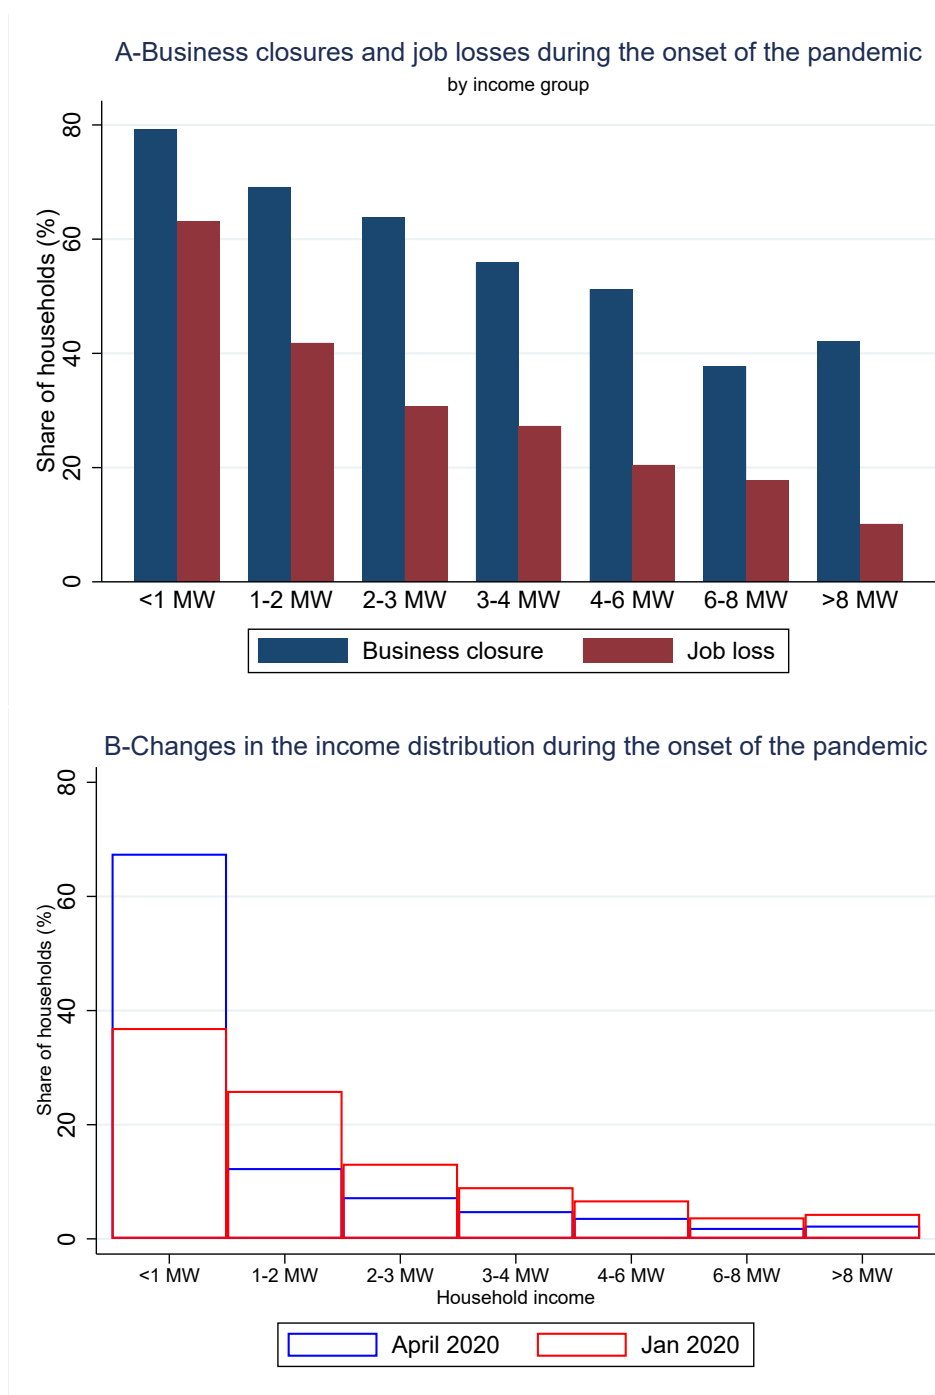

FIGURE A3. BUSINESS CLOSURES, JOB LOSSES, AND CHANGES IN THE INCOME DISTRIBUTION DURING THE PANDEMIC

*Note:* Panel A depicts the share of households reporting business closures and job losses during the onset of the pandemic within each income category (total household income in January 2020). Panel B shows the share of households by income category corresponding to pre-pandemic income (January 2020) and income during the pandemic (April 2020). In both panels, the shares are computed over the sample of households of which the age of the oldest household member was between 55 and 65 years old during the data collection period (April 2020).

TABLE A8—EFFECTS BY BUSINESS CLOSURES - INDEXES

| <b>Panel A: Business closures during the pandemic</b>        |                       |                        |                      |
|--------------------------------------------------------------|-----------------------|------------------------|----------------------|
|                                                              | Resilience<br>(1)     | Food security<br>(2)   | Stress<br>(3)        |
| Business closure X Above cutoff                              | -0.0318<br>(0.0473)   | -0.0203<br>(0.0355)    | -0.0327<br>(0.0291)  |
| Above cutoff                                                 | 0.117**<br>(0.0491)   | 0.129***<br>(0.0364)   | -0.0193<br>(0.0313)  |
| Business closure                                             | -0.111***<br>(0.0333) | -0.0901***<br>(0.0255) | 0.0337*<br>(0.0195)  |
| Mean (Below cutoff)                                          | 0.37                  | 0.54                   | 0.91                 |
| $\frac{Effect(shock=1)}{Avg.Effect} \times Share(shock = 1)$ | 0.60                  | 0.64                   | 0.85                 |
| N                                                            | 1455                  | 1455                   | 1442                 |
| <b>Panel B: Job loss during the pandemic</b>                 |                       |                        |                      |
|                                                              | Resilience<br>(1)     | Food security<br>(2)   | Stress<br>(3)        |
| Job Loss X Above cutoff                                      | 0.0172<br>(0.0388)    | 0.0102<br>(0.0324)     | -0.00743<br>(0.0258) |
| Above cutoff                                                 | 0.105***<br>(0.0390)  | 0.0853***<br>(0.0291)  | -0.0409<br>(0.0283)  |
| Job Loss                                                     | -0.193***<br>(0.0261) | -0.148***<br>(0.0224)  | 0.0230<br>(0.0164)   |
| Mean (Below cutoff)                                          | 0.37                  | 0.54                   | 0.91                 |
| $\frac{Effect(shock=1)}{Avg.Effect} \times Share(shock = 1)$ | 0.47                  | 0.46                   | 0.47                 |
| N                                                            | 1670                  | 1670                   | 1657                 |

\*\*\* $p < 0.01$ , \*\* $p < 0.05$ , \* $p < 0.1$ 

*Note:* The table reports estimates corresponding to equation (2). Results for each outcome are reported in each column. All regressions include linear trends of the running variable on each side of the cutoff, as well as demographic controls, state fixed effects, and date-of-data-collection fixed effects. Regressions are estimated using a bandwidth of 24 months before and after the age eligibility threshold (60 years old in March 2020). Robust standard errors are reported in parentheses. Triangular kernels are used in all regressions. Observations of households without businesses before the pandemic are coded as missing. Resilience includes the probability of being able to cover an unexpected financial shock and the probability of having enough resources to cover a week's worth of expenses. Food security includes the probability that a household has enough food in stock to cover a week's worth of meals, the probability that no household member experienced hunger, and the probability that the household does not report eating less healthy (such that higher values imply higher food security). Stress includes indicators of whether the respondent feels stressed due to the pandemic and due to the health of her/his family members.

TABLE A9—ROBUSTNESS OF EFFECTS BY BUSINESS CLOSURES TO CONTROLLING FOR PREDICTED COMPLIANCE AND TO ALTERNATIVE BANDWIDTHS

| Panel A: Robustness to controlling for predicted compliance (Bandwidth: -24 to 24) |                      |                      |                                        |                       |                              |                        |                       |                             |                       |
|------------------------------------------------------------------------------------|----------------------|----------------------|----------------------------------------|-----------------------|------------------------------|------------------------|-----------------------|-----------------------------|-----------------------|
| Business closure                                                                   | Received Transfer    | Can cover a shock    | Resilience<br>Enough resources (>week) | Enough food (>week)   | Food security<br>Went hungry | Eats less healthy      | Stressed (pandemic)   | Stress<br>Stressed (health) |                       |
| (1)                                                                                | (2)                  | (3)                  | (4)                                    | (5)                   | (6)                          | (7)                    | (8)                   | (9)                         |                       |
| Business closure X Above cutoff                                                    | -0.0930<br>(0.0581)  | 0.0559<br>(0.0593)   | -0.147**<br>(0.0612)                   | -0.0508<br>(0.0627)   | -0.120***<br>(0.0395)        | 0.101<br>(0.0660)      | -0.0150<br>(0.0430)   | -0.0575*<br>(0.0330)        |                       |
| Above cutoff                                                                       | -0.0133<br>(0.0459)  | -0.199<br>(0.212)    | 0.00395<br>(0.199)                     | -0.0614<br>(0.240)    | -0.263<br>(0.229)            | 0.353*<br>(0.186)      | -0.0448<br>(0.251)    | 0.103<br>(0.147)            | 0.118<br>(0.123)      |
| Business closure                                                                   |                      | 0.0303<br>(0.223)    | -0.120<br>(0.226)                      | 0.177<br>(0.236)      | 0.218<br>(0.238)             | -0.0749<br>(0.164)     | -0.173<br>(0.256)     | -0.204<br>(0.165)           | 0.0229<br>(0.119)     |
| Predicted compliance X Above cutoff                                                |                      | 0.764**<br>(0.350)   | 0.0316<br>(0.323)                      | 0.513<br>(0.393)      | 0.682*<br>(0.374)            | -0.658**<br>(0.308)    | -0.278<br>(0.408)     | -0.244<br>(0.251)           | -0.186<br>(0.208)     |
| P-val (F-test of coefs=0 within category)                                          |                      |                      | 0.01                                   |                       |                              | 0.00                   |                       | 0.20                        |                       |
| Mean (Below cutoff)                                                                | 0.69                 | 0.16                 | 0.26                                   | 0.48                  | 0.30                         | 0.22                   | 0.46                  | 0.89                        | 0.94                  |
| $\frac{Effect(shock=1)}{Avg.Effect} \times Share(shock = 1)$                       |                      | 0.74                 | 0.96                                   | 0.87                  | 0.72                         | 0.57                   | 1.61                  | 0.65                        | 0.51                  |
| N                                                                                  | 1455                 | 1391                 | 1390                                   | 1391                  | 1391                         | 1391                   | 1332                  | 1381                        | 1381                  |
| Panel B: Robustness to alternative bandwidths -12 to 12                            |                      |                      |                                        |                       |                              |                        |                       |                             |                       |
| Business closure X Above cutoff                                                    |                      | -0.132*<br>(0.0776)  | 0.0186<br>(0.0748)                     | -0.114<br>(0.0791)    | -0.0749<br>(0.0804)          | -0.0867*<br>(0.0498)   | 0.133<br>(0.0845)     | 0.0159<br>(0.0545)          | -0.0494<br>(0.0421)   |
| Above cutoff                                                                       | 0.0224<br>(0.0635)   | 0.260***<br>(0.0895) | 0.0514<br>(0.0825)                     | 0.205**<br>(0.0862)   | 0.196**<br>(0.0850)          | -0.0749<br>(0.0551)    | -0.239***<br>(0.0921) | -0.0954<br>(0.0623)         | 0.00371<br>(0.0470)   |
| Business closure                                                                   |                      | 0.0513<br>(0.0449)   | -0.102**<br>(0.0484)                   | -0.0259<br>(0.0521)   | -0.0218<br>(0.0518)          | 0.195***<br>(0.0326)   | 0.0001<br>(0.0566)    | 0.0097<br>(0.0324)          | 0.0233<br>(0.0264)    |
| P-val (F-test of coefs=0 within category)                                          |                      |                      | 0.27                                   |                       |                              | 0.03                   |                       | 0.36                        |                       |
| Mean (Below cutoff)                                                                | 0.71                 | 0.19                 | 0.24                                   | 0.45                  | 0.29                         | 0.22                   | 0.47                  | 0.90                        | 0.94                  |
| $\frac{Effect(shock=1)}{Avg.Effect} \times Share(shock = 1)$                       |                      | 0.51                 | 0.20                                   | -0.60                 | -0.35                        | 0.44                   | -0.60                 | -0.13                       | 1.13                  |
| N                                                                                  | 839                  | 839                  | 839                                    | 839                   | 839                          | 839                    | 787                   | 826                         | 830                   |
| Panel C: Robustness to alternative bandwidths -36 to 36                            |                      |                      |                                        |                       |                              |                        |                       |                             |                       |
| Business closure X Above cutoff                                                    |                      | -0.0787*<br>(0.0465) | 0.0574<br>(0.0482)                     | -0.0823<br>(0.0504)   | -0.0180<br>(0.0512)          | -0.0900***<br>(0.0328) | 0.0885*<br>(0.0535)   | -0.0287<br>(0.0352)         | -0.0549**<br>(0.0258) |
| Above cutoff                                                                       | -0.00658<br>(0.0386) | 0.288***<br>(0.0495) | 0.00683<br>(0.0511)                    | 0.161***<br>(0.0522)  | 0.0940*<br>(0.0535)          | -0.0298<br>(0.0313)    | -0.156***<br>(0.0559) | -0.00422<br>(0.0365)        | 0.0256<br>(0.0272)    |
| Business closure                                                                   |                      | 0.0219<br>(0.0275)   | -0.179***<br>(0.0331)                  | -0.0864**<br>(0.0357) | -0.0985***<br>(0.0354)       | 0.186***<br>(0.0233)   | 0.0293<br>(0.0382)    | 0.0443*<br>(0.0245)         | 0.0358*<br>(0.0193)   |
| P-val (F-test of coefs=0 within category)                                          |                      |                      | 0.05                                   |                       |                              | 0.01                   |                       | 0.09                        |                       |
| Mean (Below cutoff)                                                                | 0.68                 | 0.15                 | 0.27                                   | 0.48                  | 0.31                         | 0.21                   | 0.45                  | 0.89                        | 0.93                  |
| $\frac{Effect(shock=1)}{Avg.Effect} \times Share(shock = 1)$                       |                      | 0.60                 | 0.85                                   | -0.53                 | -0.15                        | 0.67                   | -0.62                 | 0.82                        | 3.23                  |
| N                                                                                  | 2125                 | 2125                 | 2123                                   | 2125                  | 2125                         | 2125                   | 2018                  | 2098                        | 2104                  |

\*\*\*p &lt; 0.01, \*\*p &lt; 0.05, \*p &lt; 0.1

Note: The table reports estimates corresponding to equation (2). Results for each outcome are reported in each column. All regressions include linear trends of the running variable on each side of the cutoff, as well as demographic controls, state fixed effects, and date-of-data-collection fixed effects. In addition, regressions in Panel A control for predicted compliance, and interactions of predicted compliance with business closure and being eligible for the program (above cutoff). Predicted compliance was computed using the model reported in column 4 of Appendix Table A4. Regressions in Panel B are estimated using a bandwidth of 12 months before and after the age eligibility threshold (60 years old in March 2020). Regressions in Panel C are estimated using a bandwidth of 24 months before and after the age eligibility threshold (60 years old in March 2020). Robust standard errors are reported in parentheses. Triangular kernels are used in all regressions. Observations of households without businesses before the pandemic are coded as missing.

TABLE A10—ROBUSTNESS OF EFFECTS BY PRE-PANDEMIC INCOME TO CONTROLLING FOR PREDICTED COMPLIANCE

| <b>Panel A: Low income</b>                |                          |                          |                                 |                            |                     |                          |                            |                          |
|-------------------------------------------|--------------------------|--------------------------|---------------------------------|----------------------------|---------------------|--------------------------|----------------------------|--------------------------|
|                                           | Received transfer<br>(1) | Can cover a shock<br>(2) | Enough resources (>week)<br>(3) | Enough food (>week)<br>(4) | Went hungry<br>(5)  | Eats less healthy<br>(6) | Stressed (pandemic)<br>(7) | Stressed (health)<br>(8) |
| Above cutoff                              | 0.190***<br>(0.0654)     | 0.0467<br>(0.0473)       | 0.218***<br>(0.0626)            | 0.0922<br>(0.0604)         | -0.116*<br>(0.0642) | -0.130*<br>(0.0729)      | -0.0244<br>(0.0409)        | -0.0621<br>(0.0419)      |
| P-val (F-test of coefs=0 within category) |                          |                          | 0.00                            |                            | 0.06                |                          |                            | 0.53                     |
| Mean (Below cutoff)                       | 0.17                     | 0.10                     | 0.27                            | 0.20                       | 0.36                | 0.54                     | 0.92                       | 0.94                     |
| N                                         | 765                      | 764                      | 765                             | 765                        | 765                 | 716                      | 758                        | 756                      |
| <b>Panel B: Middle income</b>             |                          |                          |                                 |                            |                     |                          |                            |                          |
| Above cutoff                              | 0.209***<br>(0.0606)     | 0.0323<br>(0.0575)       | 0.0546<br>(0.0621)              | 0.0307<br>(0.0605)         | -0.0556<br>(0.0378) | -0.105<br>(0.0671)       | -0.0148<br>(0.0444)        | -0.0202<br>(0.0354)      |
| P-val (F-test of coefs=0 within category) |                          |                          | 0.62                            |                            | 0.20                |                          |                            | 0.83                     |
| P-value (diff with low income)            | 0.83                     | 0.84                     | 0.06                            | 0.46                       | 0.41                | 0.80                     | 0.87                       | 0.43                     |
| Mean (Below cutoff)                       | 0.16                     | 0.30                     | 0.57                            | 0.34                       | 0.13                | 0.41                     | 0.87                       | 0.95                     |
| N                                         | 918                      | 918                      | 918                             | 918                        | 918                 | 887                      | 916                        | 917                      |
| <b>Panel C: High income</b>               |                          |                          |                                 |                            |                     |                          |                            |                          |
| Above cutoff                              | 0.130<br>(0.113)         | 0.119<br>(0.120)         | -0.0188<br>(0.0894)             | 0.166<br>(0.117)           | -0.0292<br>(0.0508) | 0.141<br>(0.128)         | 0.0255<br>(0.0883)         | 0.0584<br>(0.0767)       |
| P-val (F-test of coefs=0 within category) |                          |                          | 0.35                            |                            | 0.26                |                          |                            | 0.70                     |
| P-value (diff with low income)            | 0.61                     | 0.52                     | 0.02                            | 0.53                       | 0.26                | 0.04                     | 0.56                       | 0.12                     |
| Mean (Below cutoff)                       | 0.14                     | 0.84                     | 0.51                            | 0.05                       | 0.41                | 0.83                     | 0.89                       | 0.16                     |
| N                                         | 277                      | 277                      | 277                             | 277                        | 277                 | 272                      | 275                        | 275                      |

\*\*\* $p < 0.01$ , \*\* $p < 0.05$ , \* $p < 0.1$

*Note:* The table reports RD estimates corresponding to equation (1) using a bandwidth of 24 months before and after the age eligibility cutoff (March 2020) and triangular kernels. All regressions include linear trends of the running variable on each side of the cutoff, as well as demographic controls, state fixed effects, and date-of-data-collection fixed effects. Demographic controls include the respondents' age, gender, civil status (single vs. married or cohabiting), and educational attainment (primary, secondary, college, graduate studies). We also control for household size and the number of school-age children in the household. All regressions control for predicted compliance. Predicted compliance was computed using the model reported in column 4 of appendix Table A4. Robust standard errors are reported in parentheses. Panels A, B, and C report results for the subsample of households with total January 2020 income below the national monthly minimum wage (<\$ USD 300), between one and 4 times the national monthly minimum wage (\$ USD 300 to \$ USD 1,200), and over 4 times the national monthly minimum wage (> \$ 1,200), respectively.

TABLE A11—EFFECTS BY BUSINESS CLOSURES AND PRE-PANDEMIC INCOME GROUPS

| Panel A: Lower-income households (Jan 2020 monthly total household income < \$USD 300)      |                      |                      |                                        |                     |                              |                      |                      |                             |                     |
|---------------------------------------------------------------------------------------------|----------------------|----------------------|----------------------------------------|---------------------|------------------------------|----------------------|----------------------|-----------------------------|---------------------|
| Business closure                                                                            | Received Transfer    | Can cover a shock    | Resilience<br>Enough resources (>week) | Enough food (>week) | Food security<br>Went hungry | Eats less healthy    | Stressed (pandemic)  | Stress<br>Stressed (health) |                     |
| (1)                                                                                         | (2)                  | (3)                  | (4)                                    | (5)                 | (6)                          | (7)                  | (8)                  | (9)                         |                     |
| Business closure X Above cutoff                                                             | -0.202*<br>(0.115)   | -0.0129<br>(0.0751)  | -0.322***<br>(0.106)                   | -0.0736<br>(0.106)  | -0.136<br>(0.0982)           | 0.270**<br>(0.115)   | 0.0410<br>(0.0752)   | -0.0443<br>(0.0607)         |                     |
| Above cutoff                                                                                | -0.00567<br>(0.0642) | 0.301**<br>(0.121)   | 0.0196<br>(0.0729)                     | 0.482***<br>(0.101) | 0.181*<br>(0.101)            | -0.0272<br>(0.101)   | -0.463***<br>(0.108) | -0.0832<br>(0.0755)         | -0.0366<br>(0.0556) |
| Business closure                                                                            |                      | -0.0176<br>(0.0673)  | 0.0105<br>(0.0477)                     | 0.0312<br>(0.0631)  | 0.00851<br>(0.0653)          | 0.249***<br>(0.0587) | 0.0327<br>(0.0825)   | -0.0197<br>(0.0411)         | 0.0106<br>(0.0368)  |
| Mean (below cut-off)                                                                        | 0.780                | 0.174                | 0.0995                                 | 0.266               | 0.202                        | 0.365                | 0.539                | 0.918                       | 0.938               |
| $\frac{Effect(shock=1)}{Avg.Effect} \times Share(shock = 1)$                                |                      | 0.556                | -1.090                                 | -1.124              | -0.474                       | 0.798                | -0.857               | -0.641                      | 0.490               |
| N                                                                                           | 563                  | 563                  | 562                                    | 563                 | 563                          | 563                  | 521                  | 550                         | 553                 |
| Panel B: Middle-income households (Jan 2020 monthly total household income \$USD 300- 1200) |                      |                      |                                        |                     |                              |                      |                      |                             |                     |
| Business closure X Above cutoff                                                             | -0.122<br>(0.0805)   | 0.175**<br>(0.0869)  | -0.0653<br>(0.0849)                    | 0.00262<br>(0.0887) | -0.0983**<br>(0.0433)        | 0.120<br>(0.0920)    | 0.0264<br>(0.0615)   | -0.0453<br>(0.0437)         |                     |
| Above cutoff                                                                                | 0.0119<br>(0.0685)   | 0.324***<br>(0.0863) | -0.0388<br>(0.0908)                    | 0.0832<br>(0.0897)  | 0.0572<br>(0.0932)           | 0.00632<br>(0.0395)  | -0.191**<br>(0.0971) | -0.0285<br>(0.0607)         | 0.0282<br>(0.0465)  |
| Business closure                                                                            |                      | 0.0580<br>(0.0482)   | -0.180***<br>(0.0601)                  | -0.0196<br>(0.0620) | -0.0700<br>(0.0618)          | 0.166***<br>(0.0304) | -0.00928<br>(0.0641) | 0.0150<br>(0.0418)          | 0.0292<br>(0.0313)  |
| Mean (below cut-off)                                                                        | 0.488                | 0.158                | 0.304                                  | 0.567               | 0.343                        | 0.127                | 0.406                | 0.873                       | 0.948               |
| $\frac{Effect(shock=1)}{Avg.Effect} \times Share(shock = 1)$                                |                      | 0.538                | 1.517                                  | -1.048              | 0.0289                       | 1.109                | -0.687               | -1.513                      | 22.92               |
| N                                                                                           | 688                  | 688                  | 688                                    | 688                 | 688                          | 688                  | 660                  | 684                         | 686                 |
| Panel C: Higher-income households (Jan 2020 monthly total household income > \$USD 1200)    |                      |                      |                                        |                     |                              |                      |                      |                             |                     |
| Business closure X Above cutoff                                                             | -0.190<br>(0.157)    | -0.0872<br>(0.177)   | -0.243<br>(0.159)                      | -0.259*<br>(0.156)  | 0.00612<br>(0.0838)          | 0.287<br>(0.181)     | -0.0666<br>(0.128)   | -0.0206<br>(0.0829)         |                     |
| Above cutoff                                                                                | -0.172<br>(0.157)    | 0.0727<br>(0.154)    | 0.0114<br>(0.171)                      | 0.0120<br>(0.127)   | 0.148<br>(0.144)             | -0.0501<br>(0.0750)  | -0.0158<br>(0.196)   | -0.00855<br>(0.115)         | 0.0402<br>(0.0972)  |
| Business closure                                                                            |                      | 0.156*<br>(0.0915)   | -0.0885<br>(0.112)                     | 0.0500<br>(0.0903)  | 0.0298<br>(0.118)            | 0.0789<br>(0.0604)   | -0.0637<br>(0.129)   | 0.0958<br>(0.0877)          | 0.0373<br>(0.0723)  |
| Mean (below cut-off)                                                                        | 0.488                | 0.142                | 0.634                                  | 0.845               | 0.509                        | 0.0459               | 0.409                | 0.828                       | 0.888               |
| $\frac{Effect(shock=1)}{Avg.Effect} \times Share(shock = 1)$                                |                      | 4.041                | 1.410                                  | 1.123               | -3.704                       | -0.0583              | 1.139                | 0.778                       | -0.301              |
| N                                                                                           | 198                  | 198                  | 198                                    | 198                 | 198                          | 198                  | 196                  | 197                         | 197                 |

\*\*\* p &lt; 0.01, \*\* p &lt; 0.05, \* p &lt; 0.1

Note: The table reports estimates corresponding to equation (2). Results for each outcome are reported in each column. All regressions include linear trends of the running variable on each side of the cutoff, as well as demographic controls, state fixed effects, and date-of-data-collection fixed effects. All regressions are estimated over a bandwidth of 24 months before and after the age eligibility threshold (60 years old in March 2020). Robust standard errors are reported in parentheses. Triangular kernels are used in all regressions. Panel A reports results for the subsample of households with total January 2020 income below the national monthly minimum wage (< \$ USD 300). Panel B reports results for the subsample of households with total January 2020 income between one and 4 times the national monthly minimum wage (\$ USD 300 to \$ USD 1,200). Panel C reports results for the subsample of households with total January 2020 income over 4 times the national monthly minimum wage (> \$ 1,200). Observations of households without businesses before the pandemic are coded as missing.
